# Supplementary material for: Bimetallic Re(i)/Pt(ii)/Pd(ii) complexes: study of synthesis and properties
Source: Royal Society of Chemistry journal article supplement (doi:10.1039/d3nj00965c), 2023-01-01
Supplement: d3nj00965c1.pdf [file d3nj00965c1.pdf]

# **Bimetallic Re(I)/Pt(II)/Pd(II) Complexes: Syntheses and Property Study**

## **Supporting Information**

Nan Wang,<sup>\*a</sup> Qingdong Zhou<sup>a</sup> and Zhiyu Jia<sup>\*a</sup>

<sup>a</sup> Key Laboratory of Cluster Science of Ministry of Education, Beijing Key Laboratory of Photoelectronic/Electrophotonic Conversion Materials, School of Chemistry and Chemical Engineering, Beijing Institute of Technology, Beijing 100081, P. R. China

### **Table of Contents**

S1. Experimental Details

S2. Computational Study

S3. Electrochemical Study

S4. X-ray Crystallographic Data

S5. Experimental Spectra

References

## S1. Experimental Details

**General.** All reactions were performed under dry N<sub>2</sub> with standard Schlenk techniques unless otherwise noted. The syntheses of ligand **L1**,<sup>1</sup> [PtMe<sub>2</sub>(SMe<sub>2</sub>)<sub>2</sub>],<sup>2</sup> [PtPh<sub>2</sub>(DMSO)<sub>2</sub>],<sup>3</sup> Pd(acac),<sup>1</sup> Pt(acac)<sup>4</sup> and Pt(dpm)<sup>4</sup> were achieved by methods described in the literature.

**Molecular calculation:** The computational calculations were performed using Gaussian09, D.01 program package.<sup>5</sup> The ground-state geometries were fully optimized at the B3LYP<sup>6, 7</sup> level using LANL2DZ basis set for platinum and rhenium as well as 6-311G(dp) basis set for all other atoms.<sup>8</sup> The initial geometric parameters in the calculations were employed from crystal structure data for geometry optimization. Time-dependent density function theory (TD-DFT) calculations were performed to obtain the vertical singlet and triplet excitation energies.

**Synthesis of Re-L1.** Re(CO)<sub>5</sub>Cl (155 mg, 0.43 mmol) and ligand **L1** (200 mg, 0.43 mmol) were dissolved in 40 mL toluene. The reaction mixture was stirred with reflux for 4 h. After cooling to room temperature, the yellow powder was filtered and washed with cold toluene and diethyl ether. A yield of 62% was obtained for this reaction. <sup>1</sup>H NMR (600 MHz, CD<sub>2</sub>Cl<sub>2</sub>, 298.0 K, δ, ppm): 9.16 (d, 1H, *J* = 5.2 Hz), 8.44 (d, 1H, *J* = 4.2 Hz), 8.14 (d, 1H, *J* = 8.2 Hz), 7.88 (td, 1H, *J* = 8.2 Hz, 1.3 Hz), 7.79-7.72 (m, 3H), 7.70-7.54 (m, 7H), 7.49 (d, 1H, *J* = 8.3 Hz), 7.35-7.32 (m, 3H), 7.27 (t, 1H, *J* = 7.1 Hz), 7.21 (td, 1H, *J* = 6.0 Hz, 1.1 Hz), 7.18 (s, 1H); <sup>13</sup>C{<sup>1</sup>H} NMR (150 MHz, CD<sub>2</sub>Cl<sub>2</sub>, δ, ppm): 198.3, 198.1, 189.4, 155.1, 152.5, 151.7, 149.4, 147.7, 142.9, 140.8, 139.9, 139.7, 139.4, 137.9, 137.1, 132.7, 131.1, 130.8, 129.3, 128.9, 128.8, 127.8, 127.7, 126.8, 124.6, 124.4, 124.1, 122.7, 122.1, 122.0, 120.1, 112.3, 110.9, 107.2. Anal. for C<sub>34</sub>H<sub>21</sub>N<sub>5</sub>O<sub>3</sub>ReCl : found C 53.50, H 3.20, N 8.59, calcd C 53.09, H 2.75, N 9.10.

**Synthesis of Re-Pt(dpm).** This bimetallic compound was synthesized by methods described in the literature.<sup>4</sup> To a 20 mL screw-cap vial with a stir bar are added one equivalent of **Re-L1** (0.13 mmol, 100 mg), [PtMe<sub>2</sub>(SMe<sub>2</sub>)<sub>2</sub>] (37 mg, 0.065 mmol) and 3 mL of THF. The reaction is allowed to stir 1 hr at room temperature. Then a solution of HOTf (trifluoromethanesulfonic acid, 0.4 mL, 0.35 M in THF) is added dropwise.

The mixture is stirred for 30 minutes, then a solution of Na(dipivalylmethane) (Na(dpm), 0.30 mmol in 2 mL MeOH) is added. The mixture is stirred for 1.5 hr, and then partitioned between water and CH<sub>2</sub>Cl<sub>2</sub>. The organic layer is washed with brine, dried over MgSO<sub>4</sub>, filtered, and concentrated. The residue is then purified by column chromatography using THF-CH<sub>2</sub>Cl<sub>2</sub> (1:60) as eluent to give analytically pure material. Recrystallization of the yellow product in CHCl<sub>3</sub>-hexane afforded **Re-Pt(dpm)** as orange-yellow crystals (yield 25%). <sup>1</sup>H NMR (600 MHz, CDCl<sub>3</sub>, 298.0 K, δ, ppm): 9.23 (d, 1H, *J* = 5.7 Hz), 9.12 (d, 1H, *J* = 5.8 Hz), 8.54 (d, 1H, *J* = 7.7 Hz), 8.23 (d, 1H, *J* = 8.3 Hz), 7.85-7.78 (m, 5H), 7.66 (t, 1H, *J* = 7.7 Hz), 7.59 (t, 1H, *J* = 7.4 Hz), 7.54-7.51 (m, 2H), 7.35 (t, 1H, *J* = 7.0 Hz), 7.32-7.24 (m, 4H), 6.94 (t, 1H, *J* = 6.3 Hz), 6.63 (d, 1H, *J* = 7.9 Hz), 5.94 (s, 1H), 1.40 (s, 9H), 1.33 (s, 9H); Due to the solubility issue, <sup>13</sup>C NMR was not obtained for this compound. Anal. for C<sub>45</sub>H<sub>39</sub>N<sub>5</sub>O<sub>5</sub>RePtCl : found C 46.67, H 3.29, N 5.89, calcd C 47.14, H 3.43, N 6.11.

**Synthesis of Re-Pt.** Compound **Re-Pt** was obtained using the same method as that for **Re-Pt(dpm)**. Yield 28%. <sup>1</sup>H NMR (400 MHz, CD<sub>2</sub>Cl<sub>2</sub>, 298.0 K, δ, ppm): 9.19 (d, 1H, *J* = 6.0 Hz), 9.03 (d, 1H, *J* = 5.3 Hz), 8.33 (d, 1H, *J* = 8.0 Hz), 8.18 (d, 1H, *J* = 8.3 Hz), 7.90-7.79 (m, 5H), 7.68 (td, 1H, *J* = 7.2 Hz, 1.2 Hz), 7.62 (td, 1H, *J* = 7.3 Hz, 0.9 Hz), 7.58-7.54 (m, 2H), 7.40 (d, 1H, *J* = 8.2 Hz), 7.34-7.28 (m, 3H), 7.20 (td, 1H, *J* = 6.6 Hz, 1.4 Hz), 6.95 (td, 1H, *J* = 6.1 Hz, 1.4 Hz), 6.69 (d, 1H, *J* = 8.0 Hz), 5.61 (s, 1H), 2.10 (s, 3H), 2.05 (s, 3H). Due to the solubility issue, <sup>13</sup>C NMR was not obtained for this compound. Anal. for C<sub>39</sub>H<sub>27</sub>N<sub>5</sub>O<sub>5</sub>RePtCl: found C 43.62, H 2.36, N 6.29, calcd C 44.09, H 2.56, N 6.59.

**Synthesis of Re-Pt(DMSO).** A mixture of **Re-L1** (0.060 g, 0.08 mmol) and PtPh<sub>2</sub>(DMSO)<sub>2</sub> (0.039 g, 0.08 mmol) was dissolved in 30 mL of THF. The mixture was stirred at 50 °C for 6 hrs, and the solvent was removed under reduced pressure. Recrystallization from CH<sub>2</sub>Cl<sub>2</sub>-hexane afforded **Re-Pt(DMSO)** as a yellow solid in 57% yield. <sup>1</sup>H NMR (400 MHz, CD<sub>2</sub>Cl<sub>2</sub>, 298.0 K, δ, ppm): 9.68 (d, *J* = 5.4 Hz, 1H), 9.19 (d, *J* = 5.7 Hz, 1H), 8.18 (d, *J* = 7.9 Hz, 1H), 7.88 (td, *J* = 6.7 Hz, 1.3 Hz, 1H), 7.83-7.78 (m, 4H), 7.70-7.54 (m, 6H), 7.38 (d, *J* = 8.1 Hz, 1H), 7.34-7.28 (br, 1H), 7.16-7.10 (m, 6H), 6.72-6.66 (m, 2H), 5.81 (d, *J* = 8.1 Hz, 1H), 2.94 (s, 6H). Due to the

solubility issue,  $^{13}\text{C}$  NMR was not obtained for this compound. Anal calcd for  $\text{C}_{42}\text{H}_{31}\text{N}_5\text{O}_4\text{PtReSCl}$ : C, 45.10; H, 2.79; N, 6.26. Found: C, 44.71; H, 2.65; N, 5.99.

**Synthesis of Re-Pd.** A mixture of **Re-L1** (60 mg, 0.08 mmol) and  $\text{Pd}(\text{acac})_2$  (35 mg, 0.15 mmol) was suspended in 30 mL methanol. The mixture was refluxed for 2 days, and the solvent was removed under reduced pressure. The residue was washed by diethyl ether ( $3 \times 10$  mL). Recrystallization from THF-diethyl ether afforded **Re-Pd** as a dark green solid in 92% yield.  $^1\text{H}$  NMR (400 MHz,  $\text{CD}_2\text{Cl}_2$ , 298.0 K,  $\delta$ , ppm): 9.19 (d, 1H,  $J = 6.0$  Hz), 8.84 (d, 1H,  $J = 6.5$  Hz), 8.33 (d, 1H,  $J = 7.6$  Hz), 8.18 (d, 1H,  $J = 7.6$  Hz), 7.89-7.80 (m, 5H), 7.69-7.55 (m, 4H), 7.39 (d, 1H,  $J = 8.1$  Hz), 7.33-7.25 (m, 3H), 7.19 (t, 1H,  $J = 5.7$  Hz), 7.03 (t, 1H,  $J = 5.9$  Hz), 6.69 (d, 1H,  $J = 8.5$  Hz), 5.53 (s, 1H), 2.21 (s, 3H), 2.12 (s, 3H). Due to the solubility issue,  $^{13}\text{C}$  NMR was not obtained for this compound. Anal. for  $\text{C}_{39}\text{H}_{27}\text{N}_5\text{O}_5\text{RePdCl}$ : found C 48.00, H 2.78, N 7.13, calcd C 48.10, H 2.79, N 7.19.

## S2. Computational Study

**Table S1.** TD-DFT calculated electronic transitions for **Re-Pt** along with their corresponding excitation energies and oscillator strengths.

| Compound     | Spin State | Transition Configuration                | Excitation Energy [nm(eV)] | Oscillator Strength |
|--------------|------------|-----------------------------------------|----------------------------|---------------------|
| <b>Re-Pt</b> | S1         | HOMO-1→LUMO (99%)                       | 586.09 (2.12)              | 0.0004              |
|              | S2         | HOMO-2→LUMO (98%)                       | 529.59 (2.34)              | 0.0579              |
|              | S3         | HOMO→LUMO (99%)                         | 512.16 (2.42)              | 0.0023              |
|              | S4         | HOMO→LUMO+1 (91%)<br>HOMO→LUMO+3 (3%)   | 459.35 (2.70)              | 0.0667              |
|              | S5         | HOMO-4→LUMO (99%)                       | 443.29 (2.80)              | 0.0020              |
|              | T1         | HOMO-3→LUMO+1 (2%)<br>HOMO→LUMO+1 (91%) | 624.86 (1.98)              |                     |

**Table S2.** Primary orbitals which contribute to the calculated transitions of **Re-Pt** (iso = 0.03).

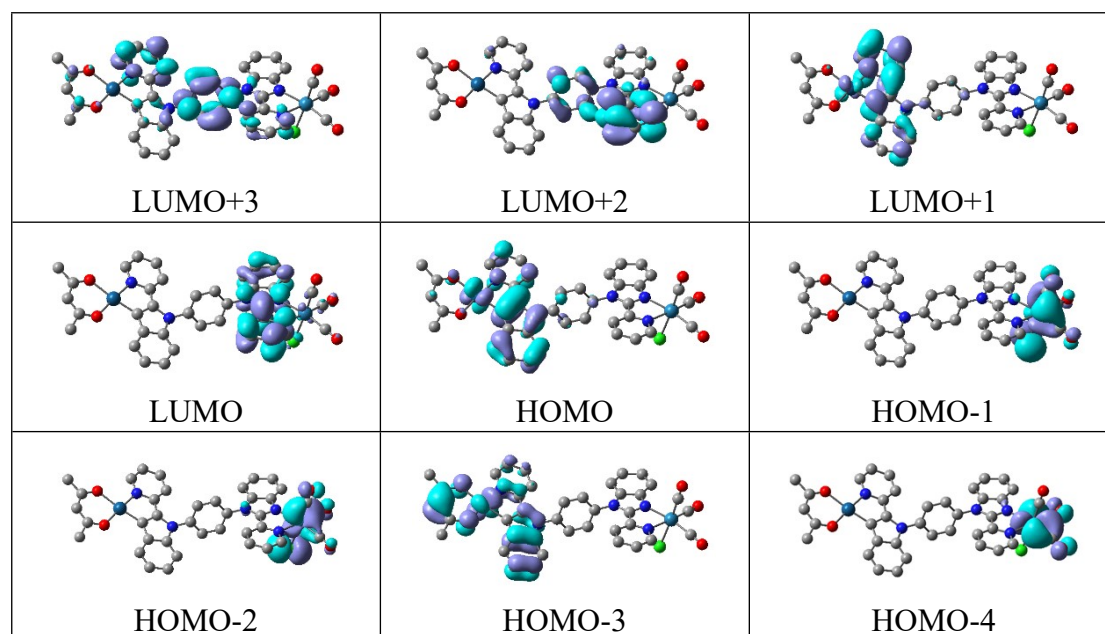

**Table S3.** TD-DFT calculated electronic transitions for **Re-L1** along with their corresponding excitation energies and oscillator strengths.

| Compound     | Spin State | Transition Configuration | Excitation Energy [nm(eV)] | Oscillator Strength |
|--------------|------------|--------------------------|----------------------------|---------------------|
| <b>Re-L1</b> | S1         | HOMO→LUMO (99%)          | 586.37(2.11)               | 0.0003              |
|              | S2         | HOMO-1→LUMO (98%)        | 528.33(2.35)               | 0.0538              |
|              | S3         | HOMO-3→LUMO (99%)        | 444.62(2.79)               | 0.0027              |
|              | S4         | HOMO-2→LUMO (100%)       | 423.86(2.93)               | 0.0034              |
|              | S5         | HOMO→LUMO+1 (93%)        | 408.99(3.03)               | 0.0031              |
|              |            | HOMO→LUMO+4 (3%)         |                            |                     |
|              | T1         | HOMO→LUMO (96%)          | 605.96(2.05)               |                     |

**Table S4.** Primary orbitals which contribute to the calculated transitions of **Re-L1** (iso = 0.03).

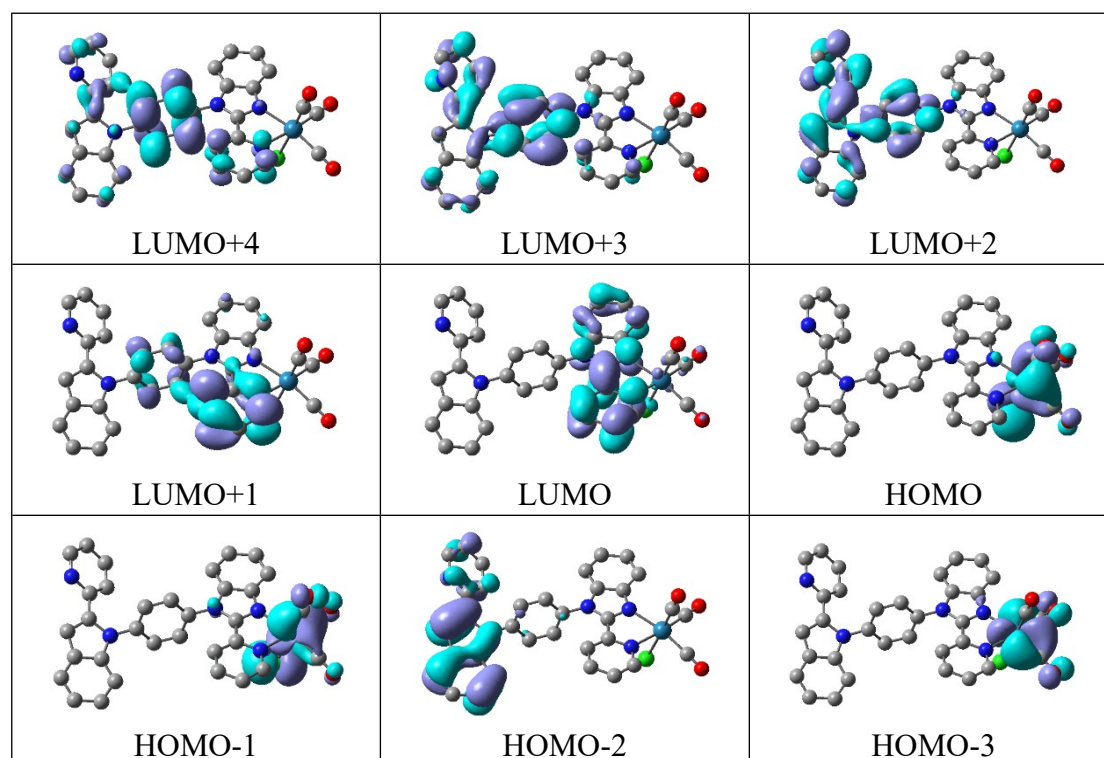

### S3. Electrochemical Study

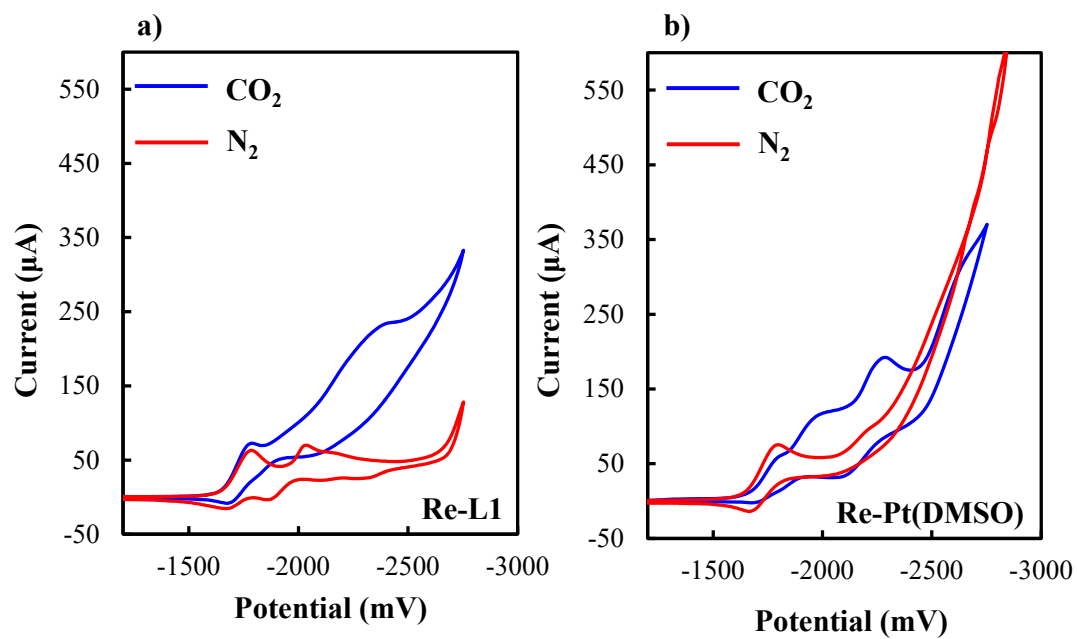

Figure S1. CV diagrams of **Re-L1** (a) and **Re-Pt(DMSO)** (b) in acetonitrile with 0.1 M  $\text{NBu}_4\text{PF}_6$  under  $\text{N}_2$  (red) and  $\text{CO}_2$  (blue) at 100 mV/s at room temperature.

## S4. X-ray Crystallographic Data

Table S5. Crystal data and structure refinement for **Re-Pt(dpm)**.

|                                   |                                                                      |         |
|-----------------------------------|----------------------------------------------------------------------|---------|
| Identification code               | Re-Pt(dpm)                                                           |         |
| Empirical formula                 | C <sub>45</sub> H <sub>39</sub> CIN <sub>5</sub> O <sub>5</sub> PtRe |         |
| Formula weight                    | 1146.55                                                              |         |
| Temperature                       | 180(2) K                                                             |         |
| Wavelength                        | 0.71073 Å                                                            |         |
| Crystal system                    | Orthorhombic                                                         |         |
| Space group                       | Pna2(1)                                                              |         |
| Unit cell dimensions              | a = 43.4528(12) Å                                                    | α = 90° |
|                                   | b = 11.8801(3) Å                                                     | β = 90° |
|                                   | c = 8.1619(2) Å                                                      | γ = 90° |
| Volume                            | 4213.37(19) Å <sup>3</sup>                                           |         |
| Z                                 | 4                                                                    |         |
| Density (calculated)              | 1.807 Mg/m <sup>3</sup>                                              |         |
| Absorption coefficient            | 6.302 mm <sup>-1</sup>                                               |         |
| F(000)                            | 2216                                                                 |         |
| Crystal size                      | 0.06 x 0.06 x 0.01 mm <sup>3</sup>                                   |         |
| Theta range for data collection   | 1.78 to 26.50°.                                                      |         |
| Index ranges                      | -54<=h<=52, -14<=k<=12, -10<=l<=10                                   |         |
| Reflections collected             | 20645                                                                |         |
| Independent reflections           | 8183 [R(int) = 0.0962]                                               |         |
| Completeness to theta = 26.50°    | 99.8 %                                                               |         |
| Absorption correction             | Semi-empirical from equivalents                                      |         |
| Max. and min. transmission        | 0.9397 and 0.7036                                                    |         |
| Refinement method                 | Full-matrix least-squares on F <sup>2</sup>                          |         |
| Data / restraints / parameters    | 8183 / 2 / 492                                                       |         |
| Goodness-of-fit on F <sup>2</sup> | 1.035                                                                |         |
| Final R indices [I>2σ(I)]         | R1 = 0.0747, wR2 = 0.1463                                            |         |
| R indices (all data)              | R1 = 0.1346, wR2 = 0.1713                                            |         |
| Absolute structure parameter      | 0.05(2)                                                              |         |
| Extinction coefficient            | 0.00047(9)                                                           |         |
| Largest diff. peak and hole       | 2.970 and -2.025 e.Å <sup>-3</sup>                                   |         |



Table S6. Atomic coordinates ( $\times 10^4$ ) and equivalent isotropic displacement parameters ( $\text{\AA}^2 \times 10^3$ ) for **Re-Pt(dpm)**.  $U(\text{eq})$  is defined as one third of the trace of the orthogonalized  $U^{ij}$  tensor.

|       | x       | y         | z         | $U(\text{eq})$ |
|-------|---------|-----------|-----------|----------------|
| Pt(1) | 5842(1) | 5658(1)   | 14274(1)  | 48(1)          |
| Re(1) | 7221(1) | 10742(1)  | 26919(1)  | 36(1)          |
| Cl(1) | 6675(1) | 10762(5)  | 27686(6)  | 46(1)          |
| O(1)  | 7398(4) | 9536(12)  | 30106(17) | 46(4)          |
| O(2)  | 7332(4) | 13064(16) | 28523(19) | 66(5)          |
| O(3)  | 7891(4) | 10605(15) | 25941(18) | 56(4)          |
| O(4)  | 5531(3) | 6341(12)  | 12737(16) | 55(4)          |
| O(5)  | 5853(3) | 4144(12)  | 13032(17) | 51(4)          |
| N(1)  | 7088(4) | 9280(15)  | 25522(18) | 39(4)          |
| N(2)  | 7043(4) | 11390(14) | 24563(17) | 36(4)          |
| N(3)  | 6799(4) | 8541(14)  | 23529(16) | 34(4)          |
| N(4)  | 6142(3) | 5093(16)  | 15957(19) | 38(4)          |
| N(5)  | 6049(5) | 7775(17)  | 18000(20) | 53(5)          |
| C(1)  | 7336(5) | 10019(18) | 28930(30) | 42(6)          |
| C(2)  | 7290(5) | 12150(20) | 27930(20) | 43(6)          |
| C(3)  | 7650(5) | 10690(20) | 26190(20) | 42(5)          |
| C(4)  | 7069(3) | 8140(8)   | 25763(15) | 26(4)          |
| C(5)  | 7203(3) | 7413(11)  | 26890(15) | 70(6)          |
| C(6)  | 7148(3) | 6262(10)  | 26788(17) | 50(5)          |
| C(7)  | 6960(3) | 5838(8)   | 25558(18) | 61(7)          |
| C(8)  | 6826(3) | 6565(11)  | 24431(15) | 42(5)          |
| C(9)  | 6880(3) | 7716(10)  | 24533(13) | 38(5)          |
| C(10) | 6924(4) | 9502(13)  | 24210(20) | 23(4)          |
| C(11) | 6899(5) | 10690(16) | 23570(20) | 35(5)          |
| C(12) | 6785(4) | 11038(17) | 22100(30) | 36(5)          |
| C(13) | 6797(5) | 12137(19) | 21620(20) | 45(5)          |
| C(14) | 6939(6) | 12900(20) | 22670(20) | 55(7)          |
| C(15) | 7055(5) | 12471(17) | 24180(30) | 44(5)          |
| C(16) | 6604(4) | 8462(16)  | 22090(20) | 34(4)          |
| C(17) | 6294(5) | 8540(20)  | 22240(19) | 58(7)          |
| C(18) | 6105(6) | 8340(20)  | 20900(20) | 51(7)          |
| C(19) | 6226(5) | 8031(15)  | 19410(30) | 44(5)          |

|       |          |           |           |         |
|-------|----------|-----------|-----------|---------|
| C(20) | 6552(4)  | 7987(16)  | 19260(30) | 43(5)   |
| C(21) | 6734(5)  | 8166(18)  | 20612(19) | 36(5)   |
| C(22) | 5867(5)  | 6950(18)  | 15680(30) | 46(6)   |
| C(23) | 5731(5)  | 8030(20)  | 15840(30) | 54(7)   |
| C(24) | 5510(7)  | 8670(20)  | 14900(30) | 76(9)   |
| C(25) | 5437(10) | 9690(30)  | 15360(40) | 126(16) |
| C(26) | 5551(9)  | 10220(30) | 16810(60) | 150(18) |
| C(27) | 5768(8)  | 9700(20)  | 17740(40) | 98(12)  |
| C(28) | 5856(5)  | 8580(18)  | 17310(20) | 45(6)   |
| C(29) | 6063(4)  | 6915(14)  | 17050(20) | 27(4)   |
| C(30) | 6205(4)  | 5787(19)  | 17270(30) | 45(6)   |
| C(31) | 6383(6)  | 5420(20)  | 18520(30) | 77(9)   |
| C(32) | 6534(6)  | 4400(20)  | 18390(30) | 59(7)   |
| C(33) | 6464(6)  | 3665(16)  | 17150(30) | 60(7)   |
| C(34) | 6263(5)  | 4101(18)  | 15890(20) | 44(6)   |
| C(35) | 5665(5)  | 3933(17)  | 11770(30) | 48(5)   |
| C(36) | 5471(5)  | 4650(20)  | 11130(30) | 62(8)   |
| C(37) | 5411(5)  | 5730(20)  | 11490(30) | 55(6)   |
| C(38) | 5825(10) | 2830(40)  | 9560(70)  | 187(19) |
| C(39) | 5976(9)  | 2150(40)  | 12030(90) | 280(40) |
| C(40) | 5441(10) | 2080(30)  | 11150(50) | 148(16) |
| C(41) | 5132(7)  | 7570(20)  | 11130(40) | 94(10)  |
| C(42) | 4884(7)  | 5830(30)  | 10380(50) | 137(16) |
| C(43) | 5307(12) | 6540(40)  | 8740(40)  | 180(20) |
| C(44) | 5696(6)  | 2720(30)  | 11250(40) | 96(12)  |
| C(45) | 5180(6)  | 6420(20)  | 10520(20) | 46(6)   |

---

Table S7. Bond lengths [ $\text{\AA}$ ] and angles [ $^\circ$ ] for **Re-Pt(dpm)**.

---

|             |           |             |           |
|-------------|-----------|-------------|-----------|
| Pt(1)-C(22) | 1.92(2)   | Re(1)-Cl(1) | 2.455(6)  |
| Pt(1)-O(4)  | 2.015(13) | O(1)-C(1)   | 1.15(2)   |
| Pt(1)-N(4)  | 2.008(16) | O(2)-C(2)   | 1.21(3)   |
| Pt(1)-O(5)  | 2.066(14) | O(3)-C(3)   | 1.07(2)   |
| Re(1)-C(2)  | 1.88(3)   | O(4)-C(37)  | 1.35(3)   |
| Re(1)-C(1)  | 1.92(2)   | O(5)-C(35)  | 1.33(3)   |
| Re(1)-C(3)  | 1.96(2)   | N(1)-C(10)  | 1.32(2)   |
| Re(1)-N(1)  | 2.157(18) | N(1)-C(4)   | 1.371(19) |
| Re(1)-N(2)  | 2.212(14) | N(2)-C(11)  | 1.32(2)   |

|             |           |                  |           |
|-------------|-----------|------------------|-----------|
| N(2)-C(15)  | 1.32(2)   | C(33)-C(34)      | 1.45(3)   |
| N(3)-C(9)   | 1.326(18) | C(35)-C(36)      | 1.31(3)   |
| N(3)-C(10)  | 1.38(2)   | C(35)-C(44)      | 1.51(3)   |
| N(3)-C(16)  | 1.45(2)   | C(36)-C(37)      | 1.34(3)   |
| N(4)-C(34)  | 1.29(2)   | C(37)-C(45)      | 1.52(3)   |
| N(4)-C(30)  | 1.38(3)   | C(38)-C(44)      | 1.50(5)   |
| N(5)-C(29)  | 1.29(2)   | C(39)-C(44)      | 1.53(5)   |
| N(5)-C(28)  | 1.39(3)   | C(40)-C(44)      | 1.34(4)   |
| N(5)-C(19)  | 1.41(3)   | C(41)-C(45)      | 1.47(3)   |
| C(4)-C(5)   | 1.3900    | C(42)-C(45)      | 1.46(4)   |
| C(4)-C(9)   | 1.3900    | C(43)-C(45)      | 1.56(4)   |
| C(5)-C(6)   | 1.3900    | C(22)-Pt(1)-O(4) | 95.0(8)   |
| C(6)-C(7)   | 1.3900    | C(22)-Pt(1)-N(4) | 79.8(9)   |
| C(7)-C(8)   | 1.3900    | O(4)-Pt(1)-N(4)  | 174.6(6)  |
| C(8)-C(9)   | 1.3900    | C(22)-Pt(1)-O(5) | 171.4(8)  |
| C(10)-C(11) | 1.51(2)   | O(4)-Pt(1)-O(5)  | 93.4(6)   |
| C(11)-C(12) | 1.36(3)   | N(4)-Pt(1)-O(5)  | 91.7(7)   |
| C(12)-C(13) | 1.36(3)   | C(2)-Re(1)-C(1)  | 89.0(8)   |
| C(13)-C(14) | 1.39(3)   | C(2)-Re(1)-C(3)  | 90.4(10)  |
| C(14)-C(15) | 1.43(3)   | C(1)-Re(1)-C(3)  | 89.9(8)   |
| C(16)-C(17) | 1.36(3)   | C(2)-Re(1)-N(1)  | 170.6(7)  |
| C(16)-C(21) | 1.38(2)   | C(1)-Re(1)-N(1)  | 99.3(7)   |
| C(17)-C(18) | 1.39(3)   | C(3)-Re(1)-N(1)  | 94.2(8)   |
| C(18)-C(19) | 1.38(3)   | C(2)-Re(1)-N(2)  | 97.3(7)   |
| C(19)-C(20) | 1.42(2)   | C(1)-Re(1)-N(2)  | 172.2(7)  |
| C(20)-C(21) | 1.38(3)   | C(3)-Re(1)-N(2)  | 94.7(7)   |
| C(22)-C(29) | 1.41(3)   | N(1)-Re(1)-N(2)  | 74.1(6)   |
| C(22)-C(23) | 1.42(3)   | C(2)-Re(1)-Cl(1) | 91.9(7)   |
| C(23)-C(24) | 1.44(3)   | C(1)-Re(1)-Cl(1) | 92.1(6)   |
| C(23)-C(28) | 1.47(3)   | C(3)-Re(1)-Cl(1) | 176.9(6)  |
| C(24)-C(25) | 1.30(4)   | N(1)-Re(1)-Cl(1) | 83.3(4)   |
| C(25)-C(26) | 1.43(4)   | N(2)-Re(1)-Cl(1) | 83.0(4)   |
| C(26)-C(27) | 1.36(4)   | C(37)-O(4)-Pt(1) | 120.8(14) |
| C(27)-C(28) | 1.43(3)   | C(35)-O(5)-Pt(1) | 121.8(13) |
| C(29)-C(30) | 1.49(3)   | C(10)-N(1)-C(4)  | 106.4(15) |
| C(30)-C(31) | 1.35(3)   | C(10)-N(1)-Re(1) | 114.5(13) |
| C(31)-C(32) | 1.38(3)   | C(4)-N(1)-Re(1)  | 137.4(11) |
| C(32)-C(33) | 1.37(3)   | C(11)-N(2)-C(15) | 118.9(17) |

|                   |           |                   |           |
|-------------------|-----------|-------------------|-----------|
| C(11)-N(2)-Re(1)  | 118.8(12) | C(19)-C(18)-C(17) | 121(2)    |
| C(15)-N(2)-Re(1)  | 122.1(14) | C(18)-C(19)-N(5)  | 124(2)    |
| C(9)-N(3)-C(10)   | 105.0(14) | C(18)-C(19)-C(20) | 118(2)    |
| C(9)-N(3)-C(16)   | 127.5(16) | N(5)-C(19)-C(20)  | 118(2)    |
| C(10)-N(3)-C(16)  | 127.4(16) | C(21)-C(20)-C(19) | 120(2)    |
| C(34)-N(4)-C(30)  | 119.8(18) | C(20)-C(21)-C(16) | 120.6(19) |
| C(34)-N(4)-Pt(1)  | 122.7(13) | C(29)-C(22)-C(23) | 101.8(18) |
| C(30)-N(4)-Pt(1)  | 117.5(15) | C(29)-C(22)-Pt(1) | 119.0(16) |
| C(29)-N(5)-C(28)  | 109.2(16) | C(23)-C(22)-Pt(1) | 139.2(17) |
| C(29)-N(5)-C(19)  | 129.5(19) | C(22)-C(23)-C(24) | 134(2)    |
| C(28)-N(5)-C(19)  | 120.6(18) | C(22)-C(23)-C(28) | 108.8(19) |
| O(1)-C(1)-Re(1)   | 176.5(17) | C(24)-C(23)-C(28) | 117(2)    |
| O(2)-C(2)-Re(1)   | 177.8(17) | C(25)-C(24)-C(23) | 120(3)    |
| O(3)-C(3)-Re(1)   | 172.4(19) | C(24)-C(25)-C(26) | 124(3)    |
| N(1)-C(4)-C(5)    | 133.1(11) | C(27)-C(26)-C(25) | 120(3)    |
| N(1)-C(4)-C(9)    | 106.9(10) | C(26)-C(27)-C(28) | 118(3)    |
| C(5)-C(4)-C(9)    | 120.0     | N(5)-C(28)-C(27)  | 135(2)    |
| C(6)-C(5)-C(4)    | 120.0     | N(5)-C(28)-C(23)  | 104.5(19) |
| C(7)-C(6)-C(5)    | 120.0     | C(27)-C(28)-C(23) | 121(2)    |
| C(6)-C(7)-C(8)    | 120.0     | N(5)-C(29)-C(22)  | 115.4(18) |
| C(9)-C(8)-C(7)    | 120.0     | N(5)-C(29)-C(30)  | 131.3(17) |
| N(3)-C(9)-C(8)    | 130.1(11) | C(22)-C(29)-C(30) | 112.1(17) |
| N(3)-C(9)-C(4)    | 109.6(11) | C(31)-C(30)-N(4)  | 121(2)    |
| C(8)-C(9)-C(4)    | 120.0     | C(31)-C(30)-C(29) | 128(2)    |
| N(1)-C(10)-N(3)   | 112.0(15) | N(4)-C(30)-C(29)  | 111.1(17) |
| N(1)-C(10)-C(11)  | 120.6(17) | C(30)-C(31)-C(32) | 119(2)    |
| N(3)-C(10)-C(11)  | 127.3(17) | C(33)-C(32)-C(31) | 121(2)    |
| N(2)-C(11)-C(12)  | 121.5(18) | C(32)-C(33)-C(34) | 115.4(18) |
| N(2)-C(11)-C(10)  | 110.0(16) | N(4)-C(34)-C(33)  | 122.8(18) |
| C(12)-C(11)-C(10) | 128.0(18) | C(36)-C(35)-O(5)  | 125(2)    |
| C(11)-C(12)-C(13) | 121.9(19) | C(36)-C(35)-C(44) | 124(3)    |
| C(12)-C(13)-C(14) | 117.9(18) | O(5)-C(35)-C(44)  | 110(2)    |
| C(13)-C(14)-C(15) | 117(2)    | C(35)-C(36)-C(37) | 131(2)    |
| N(2)-C(15)-C(14)  | 123(2)    | C(36)-C(37)-O(4)  | 127(2)    |
| C(17)-C(16)-C(21) | 120.1(17) | C(36)-C(37)-C(45) | 122(2)    |
| C(17)-C(16)-N(3)  | 120.2(16) | O(4)-C(37)-C(45)  | 111(2)    |
| C(21)-C(16)-N(3)  | 119.1(16) | C(40)-C(44)-C(38) | 108(3)    |
| C(16)-C(17)-C(18) | 120.4(17) | C(40)-C(44)-C(35) | 119(3)    |

|                   |        |                   |        |
|-------------------|--------|-------------------|--------|
| C(38)-C(44)-C(35) | 102(3) | C(41)-C(45)-C(37) | 115(2) |
| C(40)-C(44)-C(39) | 116(4) | C(42)-C(45)-C(37) | 112(2) |
| C(38)-C(44)-C(39) | 97(3)  | C(41)-C(45)-C(43) | 106(3) |
| C(35)-C(44)-C(39) | 112(2) | C(42)-C(45)-C(43) | 106(3) |
| C(41)-C(45)-C(42) | 110(3) | C(37)-C(45)-C(43) | 107(2) |

Table S8. Anisotropic displacement parameters ( $\text{\AA}^2 \times 10^3$ ) for **Re-Pt(dpm)**. The anisotropic displacement factor exponent takes the form:  $-2\pi^2[ h^2a^2U^{11} + \dots + 2hka^*b^*U^{12}]$

|       | U <sup>11</sup> | U <sup>22</sup> | U <sup>33</sup> | U <sup>23</sup> | U <sup>13</sup> | U <sup>12</sup> |
|-------|-----------------|-----------------|-----------------|-----------------|-----------------|-----------------|
| Pt(1) | 51(1)           | 53(1)           | 41(1)           | -16(1)          | -9(1)           | -6(1)           |
| Re(1) | 42(1)           | 39(1)           | 27(1)           | -8(1)           | -8(1)           | -1(1)           |
| Cl(1) | 54(3)           | 45(3)           | 40(2)           | -5(3)           | -1(2)           | 2(3)            |
| O(1)  | 55(10)          | 38(10)          | 47(8)           | 16(7)           | -18(7)          | -13(8)          |
| O(2)  | 75(13)          | 62(12)          | 61(10)          | 0(9)            | -17(9)          | -9(10)          |
| O(3)  | 47(10)          | 62(12)          | 58(9)           | 7(8)            | -8(8)           | 0(10)           |
| O(4)  | 55(10)          | 50(10)          | 61(9)           | -15(8)          | 25(8)           | -5(9)           |
| O(5)  | 48(9)           | 48(10)          | 57(8)           | -16(8)          | -14(7)          | -13(9)          |
| N(1)  | 27(9)           | 51(11)          | 39(8)           | 16(9)           | 1(7)            | -4(10)          |
| N(2)  | 56(11)          | 33(10)          | 20(7)           | 6(7)            | -9(7)           | 1(9)            |
| N(3)  | 34(10)          | 38(11)          | 29(8)           | -6(7)           | 1(8)            | 1(9)            |
| N(4)  | 12(8)           | 57(13)          | 46(9)           | -12(9)          | -1(7)           | -1(9)           |
| N(5)  | 67(14)          | 54(13)          | 38(9)           | 1(10)           | -24(9)          | -5(12)          |
| C(1)  | 44(13)          | 34(13)          | 47(13)          | -14(11)         | 4(10)           | -32(11)         |
| C(2)  | 41(14)          | 47(15)          | 41(11)          | 23(11)          | -15(9)          | 10(12)          |
| C(3)  | 36(12)          | 45(13)          | 47(11)          | 24(11)          | -30(10)         | -6(13)          |
| C(6)  | 69(16)          | 37(11)          | 44(11)          | -5(13)          | 5(14)           | -5(11)          |
| C(7)  | 73(18)          | 46(16)          | 64(14)          | -25(13)         | 38(13)          | -7(15)          |
| C(8)  | 44(12)          | 43(13)          | 40(10)          | -7(11)          | 10(11)          | -3(10)          |
| C(9)  | 42(12)          | 44(13)          | 29(10)          | 0(10)           | -5(9)           | -15(10)         |
| C(10) | 22(8)           | 9(9)            | 39(8)           | 2(8)            | 9(9)            | 6(7)            |
| C(11) | 57(14)          | 17(10)          | 32(9)           | 3(9)            | 3(9)            | -16(11)         |
| C(12) | 16(9)           | 50(14)          | 40(11)          | 5(11)           | -8(9)           | -7(9)           |
| C(13) | 56(14)          | 61(15)          | 18(10)          | 3(10)           | -5(9)           | 14(12)          |
| C(14) | 83(19)          | 49(15)          | 34(11)          | 10(11)          | 5(12)           | 17(15)          |

|       |         |         |          |          |          |         |
|-------|---------|---------|----------|----------|----------|---------|
| C(15) | 58(14)  | 41(13)  | 33(10)   | -8(11)   | 10(11)   | -10(11) |
| C(16) | 33(10)  | 46(12)  | 22(9)    | -12(9)   | -3(9)    | 9(9)    |
| C(17) | 68(17)  | 100(20) | 9(9)     | -5(9)    | -2(8)    | -7(15)  |
| C(18) | 50(15)  | 67(18)  | 36(11)   | 6(11)    | 17(10)   | 33(14)  |
| C(19) | 49(13)  | 22(10)  | 61(12)   | -13(11)  | -22(12)  | -2(10)  |
| C(20) | 23(10)  | 52(13)  | 53(11)   | -40(12)  | -7(11)   | 0(10)   |
| C(21) | 44(13)  | 46(15)  | 17(8)    | 7(9)     | 1(8)     | 1(11)   |
| C(22) | 54(15)  | 30(13)  | 55(12)   | 8(11)    | 9(11)    | -11(12) |
| C(23) | 46(15)  | 67(18)  | 50(12)   | -2(12)   | -21(11)  | -16(14) |
| C(24) | 100(20) | 43(16)  | 82(19)   | -22(14)  | -39(17)  | 28(16)  |
| C(25) | 190(40) | 80(30)  | 110(30)  | 0(20)    | -90(30)  | 40(30)  |
| C(26) | 200(40) | 90(20)  | 160(30)  | -60(30)  | -100(40) | 100(30) |
| C(27) | 160(30) | 51(18)  | 86(19)   | -24(15)  | -60(20)  | 50(20)  |
| C(28) | 57(15)  | 36(13)  | 42(11)   | -8(9)    | -15(10)  | 5(12)   |
| C(29) | 41(11)  | 23(10)  | 16(7)    | -8(9)    | -8(9)    | 6(8)    |
| C(30) | 27(11)  | 45(13)  | 63(16)   | -18(12)  | 0(9)     | -16(11) |
| C(31) | 80(20)  | 90(20)  | 63(15)   | 2(15)    | -51(14)  | 8(17)   |
| C(32) | 62(17)  | 40(15)  | 76(16)   | 12(13)   | -43(13)  | 3(13)   |
| C(33) | 85(18)  | 5(10)   | 89(19)   | 1(12)    | 6(17)    | 6(11)   |
| C(34) | 58(15)  | 34(14)  | 39(11)   | -18(10)  | -8(10)   | -1(11)  |
| C(35) | 38(12)  | 47(14)  | 60(13)   | -8(14)   | 16(13)   | -1(10)  |
| C(36) | 40(14)  | 100(20) | 44(12)   | -22(13)  | -5(10)   | -8(15)  |
| C(38) | 168     | 180(40) | 210(50)  | -70(40)  | 140(30)  | -30(40) |
| C(39) | 130(40) | 230(50) | 480(100) | -280(70) | -140(60) | 100(40) |
| C(42) | 60(20)  | 180(40) | 170(40)  | 50(30)   | -50(20)  | -10(30) |
| C(43) | 240(50) | 220(50) | 90(30)   | 30(30)   | 60(30)   | 70(40)  |
| C(44) | 35(15)  | 100(20) | 150(30)  | -90(20)  | 0(17)    | 10(16)  |
| C(45) | 52(15)  | 46(15)  | 41(11)   | -9(10)   | -15(10)  | -6(12)  |

Table S9. Hydrogen coordinates ( $\times 10^4$ ) and isotropic displacement parameters ( $\text{\AA}^2 \times 10^3$ ) for **Re-Pt(dpm)**.

|       | x    | y    | z     | U(eq) |
|-------|------|------|-------|-------|
| H(5A) | 7332 | 7702 | 27731 | 85    |
| H(6A) | 7240 | 5765 | 27559 | 60    |
| H(7A) | 6922 | 5052 | 25489 | 73    |
| H(8A) | 6697 | 6276 | 23590 | 51    |

|        |      |       |       |     |
|--------|------|-------|-------|-----|
| H(12A) | 6695 | 10500 | 21384 | 43  |
| H(13A) | 6712 | 12373 | 20607 | 54  |
| H(14A) | 6957 | 13677 | 22392 | 66  |
| H(15A) | 7145 | 12980 | 24936 | 53  |
| H(17A) | 6205 | 8723  | 23269 | 70  |
| H(18A) | 5888 | 8422  | 21011 | 61  |
| H(20A) | 6644 | 7836  | 18224 | 51  |
| H(21A) | 6951 | 8085  | 20528 | 43  |
| H(24A) | 5419 | 8353  | 13947 | 91  |
| H(25A) | 5299 | 10101 | 14689 | 151 |
| H(26A) | 5475 | 10939 | 17122 | 180 |
| H(27A) | 5860 | 10075 | 18642 | 117 |
| H(31A) | 6403 | 5865  | 19490 | 92  |
| H(32A) | 6689 | 4214  | 19157 | 71  |
| H(33A) | 6541 | 2918  | 17131 | 72  |
| H(34A) | 6219 | 3639  | 14966 | 52  |
| H(36A) | 5351 | 4358  | 10259 | 75  |
| H(38A) | 6027 | 2467  | 9506  | 281 |
| H(38B) | 5847 | 3632  | 9283  | 281 |
| H(38C) | 5686 | 2473  | 8770  | 281 |
| H(39A) | 6071 | 1637  | 11239 | 420 |
| H(39B) | 5911 | 1725  | 12999 | 420 |
| H(39C) | 6126 | 2725  | 12357 | 420 |
| H(40A) | 5286 | 2477  | 10493 | 222 |
| H(40B) | 5361 | 1943  | 12248 | 222 |
| H(40C) | 5492 | 1364  | 10621 | 222 |
| H(41A) | 5016 | 7543  | 12153 | 140 |
| H(41B) | 5017 | 8001  | 10309 | 140 |
| H(41C) | 5332 | 7924  | 11317 | 140 |
| H(42A) | 4817 | 5581  | 11463 | 206 |
| H(42B) | 4907 | 5182  | 9652  | 206 |
| H(42C) | 4730 | 6349  | 9921  | 206 |
| H(43A) | 5294 | 5808  | 8181  | 271 |
| H(43B) | 5522 | 6783  | 8780  | 271 |
| H(43C) | 5184 | 7094  | 8141  | 271 |

---

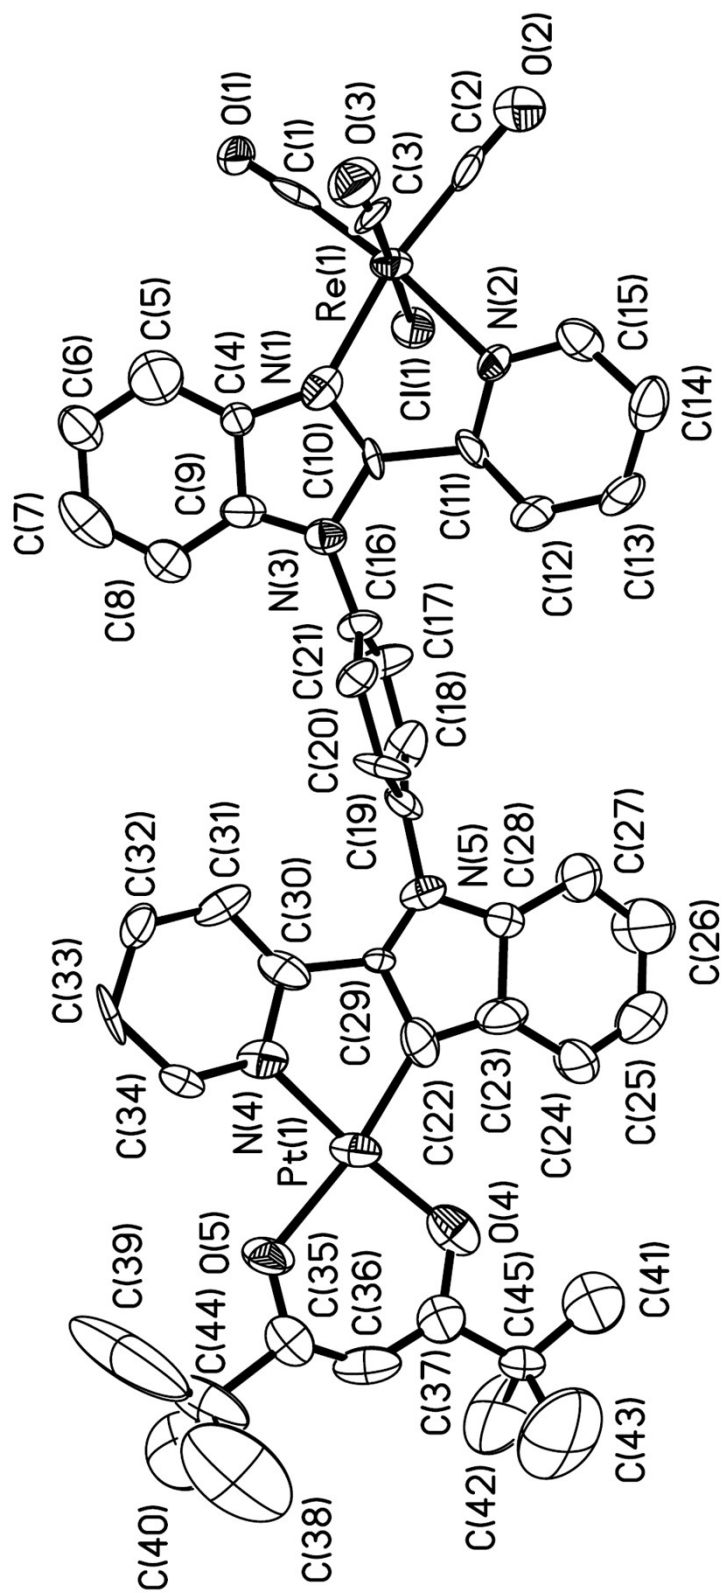

Figure S2. The structure of **Re-Pt(dpm)** showing labeling schemes and 50% thermal ellipsoids.



Table S10. Crystal data and structure refinement for **Re-Pt(dmsO)**.

|                                   |                                                                       |                                        |
|-----------------------------------|-----------------------------------------------------------------------|----------------------------------------|
| Identification code               | <b>Re-Pt(dmsO)</b>                                                    |                                        |
| Empirical formula                 | C <sub>42</sub> H <sub>31</sub> CIN <sub>5</sub> O <sub>4</sub> PtReS |                                        |
| Formula weight                    | 1118.52                                                               |                                        |
| Temperature                       | 180(2) K                                                              |                                        |
| Wavelength                        | 0.71073 Å                                                             |                                        |
| Crystal system                    | Monoclinic                                                            |                                        |
| Space group                       | P2(1)/c                                                               |                                        |
| Unit cell dimensions              | a = 19.0195(5) Å<br>b = 8.0623(2) Å<br>c = 27.8363(8) Å               | α = 90°.<br>β = 95.642(2)°<br>γ = 90°. |
| Volume                            | 4247.8(2) Å <sup>3</sup>                                              |                                        |
| Z                                 | 4                                                                     |                                        |
| Density (calculated)              | 1.749 Mg/m <sup>3</sup>                                               |                                        |
| Absorption coefficient            | 6.294 mm <sup>-1</sup>                                                |                                        |
| F(000)                            | 2144                                                                  |                                        |
| Crystal size                      | 0.10 x 0.05 x 0.05 mm <sup>3</sup>                                    |                                        |
| Theta range for data collection   | 1.73 to 26.00°.                                                       |                                        |
| Index ranges                      | -23 ≤ h ≤ 19, -9 ≤ k ≤ 9, -34 ≤ l ≤ 34                                |                                        |
| Reflections collected             | 36370                                                                 |                                        |
| Independent reflections           | 8313 [R(int) = 0.0795]                                                |                                        |
| Completeness to theta = 26.00°    | 99.7 %                                                                |                                        |
| Absorption correction             | Semi-empirical from equivalents                                       |                                        |
| Max. and min. transmission        | 0.7437 and 0.5718                                                     |                                        |
| Refinement method                 | Full-matrix least-squares on F <sup>2</sup>                           |                                        |
| Data / restraints / parameters    | 8313 / 1 / 429                                                        |                                        |
| Goodness-of-fit on F <sup>2</sup> | 1.074                                                                 |                                        |
| Final R indices [I > 2σ(I)]       | R1 = 0.1109, wR2 = 0.2899                                             |                                        |
| R indices (all data)              | R1 = 0.1452, wR2 = 0.3118                                             |                                        |
| Largest diff. peak and hole       | 11.021 and -2.331 e.Å <sup>-3</sup>                                   |                                        |

Table S11. Atomic coordinates ( $\times 10^4$ ) and equivalent isotropic displacement parameters ( $\text{\AA}^2 \times 10^3$ ) for **Re-Pt(dmsO)**.  $U(\text{eq})$  is defined as one third of the trace of the orthogonalized  $U^{ij}$  tensor.

|       | x         | y         | z        | $U(\text{eq})$ |
|-------|-----------|-----------|----------|----------------|
| Re(1) | 9978(1)   | 11428(1)  | 8564(1)  | 74(1)          |
| Pt(1) | 5231(1)   | -479(1)   | 9071(1)  | 45(1)          |
| S(1)  | 5032(3)   | -2795(6)  | 9508(2)  | 52(1)          |
| N(2)  | 9122(11)  | 10040(20) | 8198(8)  | 74(6)          |
| N(3)  | 8345(10)  | 7980(20)  | 8162(7)  | 60(5)          |
| N(4)  | 6336(8)   | -130(20)  | 9280(5)  | 46(4)          |
| N(5)  | 6234(10)  | 3440(20)  | 8457(6)  | 58(5)          |
| O(1)  | 5621(9)   | -3645(19) | 9780(7)  | 71(5)          |
| Cl(1) | 9056(3)   | 12596(11) | 9021(3)  | 86(2)          |
| N(1)  | 9719(19)  | 9260(40)  | 9093(12) | 55(9)          |
| C(1)  | 10020(20) | 8980(40)  | 9523(11) | 55(9)          |
| C(2)  | 9820(20)  | 7730(40)  | 9769(12) | 55(9)          |
| C(3)  | 9330(20)  | 6760(40)  | 9585(12) | 55(9)          |
| C(4)  | 9030(20)  | 7030(40)  | 9156(12) | 55(9)          |
| C(5)  | 9220(20)  | 8290(40)  | 8909(12) | 55(9)          |
| N(1A) | 9890(30)  | 9130(70)  | 8934(19) | 141(12)        |
| C(1A) | 10430(30) | 8910(70)  | 9403(19) | 141(12)        |
| C(2A) | 10280(30) | 7580(70)  | 9803(18) | 141(12)        |
| C(3A) | 9590(30)  | 6470(70)  | 9730(20) | 141(12)        |
| C(4A) | 9050(30)  | 6690(80)  | 9270(20) | 141(12)        |
| C(5A) | 9200(30)  | 8020(70)  | 8865(19) | 141(12)        |
| C(6)  | 8920(12)  | 8700(30)  | 8424(7)  | 55(5)          |
| C(7)  | 8768(12)  | 10230(30) | 7777(8)  | 64(6)          |
| C(8)  | 8771(11)  | 11410(30) | 7421(9)  | 65(6)          |
| C(9)  | 8276(14)  | 11070(40) | 7007(9)  | 76(7)          |
| C(10) | 7791(16)  | 9810(40)  | 6987(11) | 90(9)          |
| C(11) | 7779(13)  | 8720(40)  | 7315(9)  | 72(7)          |
| C(12) | 8256(14)  | 8800(30)  | 7707(9)  | 69(7)          |
| C(13) | 7863(11)  | 6690(30)  | 8286(8)  | 59(6)          |
| C(14) | 7917(12)  | 5160(30)  | 8108(10) | 72(7)          |
| C(15) | 7401(12)  | 3980(30)  | 8186(7)  | 54(5)          |
| C(16) | 6851(11)  | 4430(20)  | 8422(8)  | 53(5)          |

|       |           |           |          |         |
|-------|-----------|-----------|----------|---------|
| C(17) | 6839(12)  | 5990(30)  | 8649(9)  | 63(6)   |
| C(18) | 7337(15)  | 7180(30)  | 8547(10) | 84(9)   |
| C(19) | 6739(11)  | -1080(30) | 9620(7)  | 52(5)   |
| C(20) | 7454(11)  | -700(40)  | 9750(8)  | 72(8)   |
| C(21) | 7716(12)  | 510(40)   | 9541(8)  | 68(7)   |
| C(22) | 7360(11)  | 1430(30)  | 9211(8)  | 58(6)   |
| C(23) | 6629(11)  | 1150(30)  | 9063(7)  | 49(5)   |
| C(24) | 6144(12)  | 2010(20)  | 8748(7)  | 48(5)   |
| C(25) | 5459(12)  | 1540(30)  | 8686(6)  | 52(6)   |
| C(26) | 5081(12)  | 2690(20)  | 8342(7)  | 48(5)   |
| C(27) | 4393(15)  | 2880(30)  | 8127(6)  | 63(7)   |
| C(28) | 4206(11)  | 4130(30)  | 7808(8)  | 54(5)   |
| C(29) | 4710(20)  | 5250(30)  | 7708(9)  | 96(11)  |
| C(30) | 5440(14)  | 5080(30)  | 7893(9)  | 66(7)   |
| C(31) | 5566(11)  | 3780(30)  | 8203(7)  | 52(5)   |
| C(32) | 4189(6)   | -373(19)  | 8835(5)  | 49(5)   |
| C(33) | 3936(10)  | -1170(20) | 8411(5)  | 86(9)   |
| C(34) | 3234(11)  | -980(30)  | 8227(6)  | 97(11)  |
| C(35) | 2786(7)   | 20(30)    | 8467(8)  | 104(12) |
| C(36) | 3039(8)   | 820(20)   | 8891(8)  | 97(11)  |
| C(37) | 3740(8)   | 620(20)   | 9075(5)  | 69(6)   |
| C(38) | 4410(11)  | -2370(30) | 9922(8)  | 52(5)   |
| C(39) | 4538(15)  | -4290(30) | 9154(8)  | 69(7)   |
| O(2)  | 9943(15)  | 14720(30) | 8024(11) | 141(11) |
| O(3)  | 11101(13) | 10260(40) | 7925(12) | 148(12) |
| O(4)  | 11185(12) | 12700(40) | 9291(11) | 142(11) |
| C(40) | 10750(20) | 12290(50) | 8986(13) | 105(10) |
| C(41) | 10650(20) | 10630(60) | 8184(15) | 121(13) |
| C(42) | 9952(16)  | 13500(30) | 8218(9)  | 79(7)   |

Table S12. Bond lengths [ $\text{\AA}$ ] and angles [ $^\circ$ ] for **Re-Pt(dmsO)**.

|             |           |             |           |
|-------------|-----------|-------------|-----------|
| Re(1)-C(41) | 1.86(5)   | Re(1)-N(1)  | 2.37(3)   |
| Re(1)-C(40) | 1.92(4)   | Re(1)-Cl(1) | 2.454(7)  |
| Re(1)-C(42) | 1.927(17) | Pt(1)-C(25) | 2.02(2)   |
| Re(1)-N(1A) | 2.14(5)   | Pt(1)-C(32) | 2.028(12) |
| Re(1)-N(2)  | 2.15(2)   | Pt(1)-N(4)  | 2.144(15) |

|             |           |                   |           |
|-------------|-----------|-------------------|-----------|
| Pt(1)-S(1)  | 2.282(5)  | C(16)-C(17)       | 1.41(3)   |
| S(1)-O(1)   | 1.460(17) | C(17)-C(18)       | 1.40(3)   |
| S(1)-C(38)  | 1.761(19) | C(19)-C(20)       | 1.41(3)   |
| S(1)-C(39)  | 1.77(2)   | C(20)-C(21)       | 1.27(4)   |
| N(2)-C(7)   | 1.30(3)   | C(21)-C(22)       | 1.31(3)   |
| N(2)-C(6)   | 1.32(3)   | C(22)-C(23)       | 1.43(3)   |
| N(3)-C(6)   | 1.38(3)   | C(23)-C(24)       | 1.39(3)   |
| N(3)-C(12)  | 1.42(3)   | C(24)-C(25)       | 1.35(3)   |
| N(3)-C(13)  | 1.45(3)   | C(25)-C(26)       | 1.47(3)   |
| N(4)-C(23)  | 1.34(3)   | C(26)-C(31)       | 1.36(3)   |
| N(4)-C(19)  | 1.38(3)   | C(26)-C(27)       | 1.39(3)   |
| N(5)-C(31)  | 1.42(3)   | C(27)-C(28)       | 1.37(3)   |
| N(5)-C(16)  | 1.43(3)   | C(28)-C(29)       | 1.36(4)   |
| N(5)-C(24)  | 1.43(2)   | C(29)-C(30)       | 1.44(4)   |
| N(1)-C(5)   | 1.29(2)   | C(30)-C(31)       | 1.36(3)   |
| N(1)-C(1)   | 1.30(2)   | C(32)-C(33)       | 1.3900    |
| C(1)-C(2)   | 1.29(2)   | C(32)-C(37)       | 1.3900    |
| C(2)-C(3)   | 1.29(2)   | C(33)-C(34)       | 1.3900    |
| C(3)-C(4)   | 1.29(2)   | C(34)-C(35)       | 1.3900    |
| C(4)-C(5)   | 1.29(2)   | C(35)-C(36)       | 1.3900    |
| C(5)-C(6)   | 1.45(3)   | C(36)-C(37)       | 1.3900    |
| N(1A)-C(5A) | 1.59(4)   | O(2)-C(42)        | 1.12(3)   |
| N(1A)-C(1A) | 1.59(4)   | O(3)-C(41)        | 1.21(4)   |
| C(1A)-C(2A) | 1.59(4)   | O(4)-C(40)        | 1.17(4)   |
| C(2A)-C(3A) | 1.59(4)   | C(41)-Re(1)-C(40) | 86.6(17)  |
| C(3A)-C(4A) | 1.59(4)   | C(41)-Re(1)-C(42) | 90.1(16)  |
| C(4A)-C(5A) | 1.59(4)   | C(40)-Re(1)-C(42) | 88.4(15)  |
| C(5A)-C(6)  | 1.40(5)   | C(41)-Re(1)-N(1A) | 94(2)     |
| C(7)-C(8)   | 1.37(3)   | C(40)-Re(1)-N(1A) | 96.2(18)  |
| C(7)-C(12)  | 1.51(4)   | C(42)-Re(1)-N(1A) | 174.2(17) |
| C(8)-C(9)   | 1.44(3)   | C(41)-Re(1)-N(2)  | 94.7(15)  |
| C(9)-C(10)  | 1.37(4)   | C(40)-Re(1)-N(2)  | 167.9(13) |
| C(10)-C(11) | 1.27(4)   | C(42)-Re(1)-N(2)  | 103.5(10) |
| C(11)-C(12) | 1.35(3)   | N(1A)-Re(1)-N(2)  | 71.7(16)  |
| C(13)-C(14) | 1.34(3)   | C(41)-Re(1)-N(1)  | 107.1(17) |
| C(13)-C(18) | 1.35(3)   | C(40)-Re(1)-N(1)  | 94.7(13)  |
| C(14)-C(15) | 1.40(3)   | C(42)-Re(1)-N(1)  | 162.6(14) |
| C(15)-C(16) | 1.34(3)   | N(1A)-Re(1)-N(1)  | 13.7(18)  |

|                   |           |                   |            |
|-------------------|-----------|-------------------|------------|
| N(2)-Re(1)-N(1)   | 73.5(8)   | C(4)-C(5)-N(1)    | 120.0      |
| C(41)-Re(1)-Cl(1) | 176.2(13) | C(4)-C(5)-C(6)    | 124(2)     |
| C(40)-Re(1)-Cl(1) | 95.2(11)  | N(1)-C(5)-C(6)    | 116(2)     |
| C(42)-Re(1)-Cl(1) | 86.6(9)   | C(5A)-N(1A)-C(1A) | 120.0      |
| N(1A)-Re(1)-Cl(1) | 89.5(15)  | C(5A)-N(1A)-Re(1) | 122(3)     |
| N(2)-Re(1)-Cl(1)  | 84.2(7)   | C(1A)-N(1A)-Re(1) | 115(3)     |
| N(1)-Re(1)-Cl(1)  | 76.0(11)  | C(2A)-C(1A)-N(1A) | 119.99(9)  |
| C(25)-Pt(1)-C(32) | 92.8(8)   | C(1A)-C(2A)-C(3A) | 120.01(6)  |
| C(25)-Pt(1)-N(4)  | 77.5(8)   | C(4A)-C(3A)-C(2A) | 120.00(7)  |
| C(32)-Pt(1)-N(4)  | 169.7(7)  | C(3A)-C(4A)-C(5A) | 120.01(10) |
| C(25)-Pt(1)-S(1)  | 177.2(7)  | C(6)-C(5A)-N(1A)  | 97(4)      |
| C(32)-Pt(1)-S(1)  | 89.9(5)   | C(6)-C(5A)-C(4A)  | 143(3)     |
| N(4)-Pt(1)-S(1)   | 99.9(5)   | N(1A)-C(5A)-C(4A) | 120.0      |
| O(1)-S(1)-C(38)   | 106.4(10) | N(2)-C(6)-N(3)    | 110.0(19)  |
| O(1)-S(1)-C(39)   | 107.9(12) | N(2)-C(6)-C(5A)   | 129(3)     |
| C(38)-S(1)-C(39)  | 98.2(11)  | N(3)-C(6)-C(5A)   | 121(3)     |
| O(1)-S(1)-Pt(1)   | 120.1(7)  | N(2)-C(6)-C(5)    | 122(2)     |
| C(38)-S(1)-Pt(1)  | 110.4(7)  | N(3)-C(6)-C(5)    | 128(2)     |
| C(39)-S(1)-Pt(1)  | 111.6(8)  | C(5A)-C(6)-C(5)   | 10(3)      |
| C(7)-N(2)-C(6)    | 112(2)    | N(2)-C(7)-C(8)    | 134(3)     |
| C(7)-N(2)-Re(1)   | 131.7(18) | N(2)-C(7)-C(12)   | 107(2)     |
| C(6)-N(2)-Re(1)   | 116.1(15) | C(8)-C(7)-C(12)   | 119(2)     |
| C(6)-N(3)-C(12)   | 107.1(19) | C(7)-C(8)-C(9)    | 113(2)     |
| C(6)-N(3)-C(13)   | 131.3(18) | C(10)-C(9)-C(8)   | 124(3)     |
| C(12)-N(3)-C(13)  | 121.5(19) | C(11)-C(10)-C(9)  | 123(3)     |
| C(23)-N(4)-C(19)  | 120.3(18) | C(10)-C(11)-C(12) | 119(3)     |
| C(23)-N(4)-Pt(1)  | 114.5(14) | C(11)-C(12)-N(3)  | 135(2)     |
| C(19)-N(4)-Pt(1)  | 125.2(14) | C(11)-C(12)-C(7)  | 121(2)     |
| C(31)-N(5)-C(16)  | 124.0(19) | N(3)-C(12)-C(7)   | 103(2)     |
| C(31)-N(5)-C(24)  | 106.6(17) | C(14)-C(13)-C(18) | 124(2)     |
| C(16)-N(5)-C(24)  | 129.3(19) | C(14)-C(13)-N(3)  | 120(2)     |
| C(5)-N(1)-C(1)    | 120.0     | C(18)-C(13)-N(3)  | 116(2)     |
| C(5)-N(1)-Re(1)   | 113.0(13) | C(13)-C(14)-C(15) | 119(2)     |
| C(1)-N(1)-Re(1)   | 127.0(14) | C(16)-C(15)-C(14) | 119(2)     |
| C(2)-C(1)-N(1)    | 119.97(6) | C(15)-C(16)-C(17) | 120.8(18)  |
| C(3)-C(2)-C(1)    | 120.0     | C(15)-C(16)-N(5)  | 124.5(19)  |
| C(2)-C(3)-C(4)    | 120.0     | C(17)-C(16)-N(5)  | 114.7(19)  |
| C(5)-C(4)-C(3)    | 120.00(6) | C(18)-C(17)-C(16) | 118.6(18)  |

|                   |           |                   |           |
|-------------------|-----------|-------------------|-----------|
| C(13)-C(18)-C(17) | 118(2)    | C(29)-C(28)-C(27) | 119(2)    |
| N(4)-C(19)-C(20)  | 121(2)    | C(28)-C(29)-C(30) | 122(2)    |
| C(21)-C(20)-C(19) | 117(2)    | C(31)-C(30)-C(29) | 114(2)    |
| C(20)-C(21)-C(22) | 124(2)    | C(26)-C(31)-C(30) | 127(2)    |
| C(21)-C(22)-C(23) | 122(2)    | C(26)-C(31)-N(5)  | 109.5(19) |
| N(4)-C(23)-C(24)  | 112.8(18) | C(30)-C(31)-N(5)  | 124(2)    |
| N(4)-C(23)-C(22)  | 115(2)    | C(33)-C(32)-C(37) | 120.0     |
| C(24)-C(23)-C(22) | 132(2)    | C(33)-C(32)-Pt(1) | 120.1(9)  |
| C(25)-C(24)-C(23) | 120.7(18) | C(37)-C(32)-Pt(1) | 119.7(9)  |
| C(25)-C(24)-N(5)  | 109(2)    | C(32)-C(33)-C(34) | 120.0     |
| C(23)-C(24)-N(5)  | 130.5(19) | C(33)-C(34)-C(35) | 120.0     |
| C(24)-C(25)-C(26) | 108.0(17) | C(36)-C(35)-C(34) | 120.0     |
| C(24)-C(25)-Pt(1) | 114.4(17) | C(37)-C(36)-C(35) | 120.0     |
| C(26)-C(25)-Pt(1) | 137.6(15) | C(36)-C(37)-C(32) | 120.0     |
| C(31)-C(26)-C(27) | 116.2(19) | O(4)-C(40)-Re(1)  | 171(3)    |
| C(31)-C(26)-C(25) | 107.1(19) | O(3)-C(41)-Re(1)  | 174(4)    |
| C(27)-C(26)-C(25) | 136.7(19) | O(2)-C(42)-Re(1)  | 179(3)    |
| C(28)-C(27)-C(26) | 122(2)    |                   |           |

---

Table S13. Anisotropic displacement parameters ( $\text{\AA}^2 \times 10^3$ ) for **Re-Pt(dmso)**. The anisotropic displacement factor exponent takes the form:  $-2\pi^2[h^2a^{*2}U^{11} + \dots + 2hka^*b^*U^{12}]$

|       | U <sup>11</sup> | U <sup>22</sup> | U <sup>33</sup> | U <sup>23</sup> | U <sup>13</sup> | U <sup>12</sup> |
|-------|-----------------|-----------------|-----------------|-----------------|-----------------|-----------------|
| Re(1) | 39(1)           | 57(1)           | 126(1)          | -21(1)          | 3(1)            | -15(1)          |
| Pt(1) | 49(1)           | 39(1)           | 48(1)           | -3(1)           | 11(1)           | -9(1)           |
| S(1)  | 64(3)           | 35(3)           | 59(3)           | 0(2)            | 19(3)           | -3(2)           |
| N(2)  | 65(13)          | 44(11)          | 106(16)         | 17(11)          | -24(12)         | 1(9)            |
| N(3)  | 64(12)          | 44(10)          | 66(11)          | 0(9)            | -18(9)          | -18(9)          |
| N(4)  | 32(8)           | 64(11)          | 44(8)           | -26(8)          | 16(7)           | -11(7)          |
| N(5)  | 65(12)          | 53(11)          | 56(10)          | -3(9)           | 12(9)           | -20(9)          |
| O(1)  | 75(11)          | 42(9)           | 98(12)          | 23(8)           | 18(9)           | 8(8)            |
| Cl(1) | 54(3)           | 110(6)          | 94(5)           | 4(4)            | 7(3)            | -13(4)          |
| N(1)  | 67(15)          | 34(11)          | 53(13)          | -3(8)           | -50(11)         | -7(10)          |
| C(1)  | 67(15)          | 34(11)          | 53(13)          | -3(8)           | -50(11)         | -7(10)          |
| C(2)  | 67(15)          | 34(11)          | 53(13)          | -3(8)           | -50(11)         | -7(10)          |
| C(3)  | 67(15)          | 34(11)          | 53(13)          | -3(8)           | -50(11)         | -7(10)          |
| C(4)  | 67(15)          | 34(11)          | 53(13)          | -3(8)           | -50(11)         | -7(10)          |
| C(5)  | 67(15)          | 34(11)          | 53(13)          | -3(8)           | -50(11)         | -7(10)          |
| C(6)  | 63(13)          | 55(13)          | 45(11)          | -5(10)          | -4(9)           | -27(11)         |
| C(7)  | 52(13)          | 76(16)          | 64(13)          | 23(12)          | 6(11)           | 27(12)          |
| C(8)  | 44(12)          | 72(16)          | 80(15)          | 30(13)          | 9(11)           | 0(11)           |
| C(9)  | 63(15)          | 90(20)          | 67(15)          | 19(14)          | -14(12)         | 12(15)          |
| C(10) | 80(20)          | 110(20)         | 82(18)          | 19(18)          | -9(15)          | 11(18)          |
| C(11) | 62(15)          | 83(18)          | 65(14)          | -10(14)         | -32(12)         | -16(13)         |
| C(12) | 84(17)          | 59(14)          | 72(15)          | 23(12)          | 47(14)          | 8(13)           |
| C(13) | 50(12)          | 67(15)          | 61(13)          | -12(11)         | 5(10)           | -30(11)         |
| C(14) | 40(12)          | 75(17)          | 102(19)         | -29(15)         | 11(12)          | -16(11)         |
| C(15) | 77(15)          | 42(11)          | 45(10)          | -2(9)           | 16(10)          | -22(10)         |
| C(16) | 54(12)          | 34(10)          | 74(13)          | -4(10)          | 17(10)          | -18(9)          |
| C(17) | 56(13)          | 59(14)          | 79(15)          | -31(12)         | 34(12)          | -12(11)         |
| C(18) | 100(20)         | 56(14)          | 110(20)         | -41(15)         | 61(17)          | -39(14)         |
| C(19) | 60(13)          | 56(13)          | 41(10)          | 2(9)            | 11(9)           | 8(10)           |
| C(20) | 41(12)          | 120(20)         | 50(12)          | 5(14)           | -2(10)          | -8(14)          |
| C(21) | 50(13)          | 100(20)         | 51(12)          | -16(14)         | -5(10)          | -30(14)         |
| C(22) | 48(12)          | 72(15)          | 54(12)          | -19(11)         | 5(10)           | -20(11)         |

|       |         |         |         |          |         |         |
|-------|---------|---------|---------|----------|---------|---------|
| C(23) | 57(12)  | 53(12)  | 39(9)   | -1(9)    | 16(9)   | -5(10)  |
| C(24) | 70(14)  | 34(10)  | 46(10)  | -4(8)    | 32(10)  | -24(10) |
| C(25) | 72(14)  | 52(12)  | 35(9)   | -25(9)   | 22(9)   | -36(11) |
| C(26) | 67(14)  | 31(10)  | 45(10)  | 5(8)     | 3(10)   | -1(9)   |
| C(27) | 130(20) | 39(11)  | 23(8)   | -15(8)   | 12(11)  | 3(12)   |
| C(28) | 38(11)  | 63(14)  | 63(12)  | 2(11)    | 11(9)   | 2(10)   |
| C(29) | 180(40) | 44(14)  | 64(15)  | 30(12)   | 38(19)  | 32(19)  |
| C(30) | 70(16)  | 63(15)  | 71(14)  | -8(12)   | 37(13)  | -19(13) |
| C(31) | 48(12)  | 62(14)  | 48(11)  | 7(10)    | 12(9)   | -5(10)  |
| C(33) | 100(20) | 71(18)  | 91(19)  | 8(15)    | 20(16)  | -47(16) |
| C(34) | 69(19)  | 140(30) | 78(18)  | 15(19)   | -6(15)  | -40(20) |
| C(35) | 80(20)  | 100(30) | 120(30) | 40(20)   | -20(20) | -50(20) |
| C(36) | 50(15)  | 120(30) | 120(30) | 60(20)   | 26(16)  | 19(16)  |
| C(38) | 53(12)  | 44(11)  | 62(12)  | 9(10)    | 18(10)  | 1(10)   |
| C(39) | 100(20) | 48(13)  | 61(13)  | -16(11)  | 33(13)  | -20(13) |
| O(2)  | 130(20) | 120(20) | 160(20) | 64(18)   | -45(18) | -51(17) |
| O(3)  | 86(16)  | 150(20) | 210(30) | -110(20) | 2(17)   | 4(16)   |
| O(4)  | 86(16)  | 120(20) | 200(30) | 0(20)    | -72(17) | -5(14)  |

Table S14. Hydrogen coordinates ( $\times 10^4$ ) and isotropic displacement parameters ( $\text{\AA}^2 \times 10^3$ ) for **Re-Pt(dmsO)**.

|        | x     | y     | z     | U(eq) |
|--------|-------|-------|-------|-------|
| —      |       |       |       |       |
| H(1A)  | 10386 | 9690  | 9657  | 66    |
| H(2A)  | 10046 | 7522  | 10084 | 66    |
| H(3A)  | 9183  | 5837  | 9766  | 66    |
| H(4A)  | 8660  | 6321  | 9021  | 66    |
| H(1AA) | 10849 | 9575  | 9445  | 170   |
| H(2AA) | 10606 | 7455  | 10083 | 170   |
| H(3AA) | 9498  | 5681  | 9973  | 170   |
| H(4AA) | 8632  | 6026  | 9225  | 170   |
| H(8A)  | 9071  | 12355 | 7445  | 78    |
| H(9A)  | 8285  | 11766 | 6732  | 91    |
| H(10A) | 7449  | 9751  | 6715  | 108   |
| H(11A) | 7438  | 7856  | 7284  | 87    |
| H(14A) | 8301  | 4880  | 7929  | 86    |



|        |      |       |       |     |
|--------|------|-------|-------|-----|
| H(15A) | 7441 | 2875  | 8074  | 65  |
| H(17A) | 6499 | 6227  | 8868  | 75  |
| H(18A) | 7307 | 8288  | 8657  | 101 |
| H(19A) | 6529 | -1993 | 9766  | 62  |
| H(20A) | 7731 | -1338 | 9986  | 86  |
| H(21A) | 8198 | 774   | 9627  | 82  |
| H(22A) | 7597 | 2308  | 9066  | 70  |
| H(27A) | 4042 | 2118  | 8205  | 75  |
| H(28A) | 3736 | 4219  | 7660  | 65  |
| H(29A) | 4570 | 6180  | 7511  | 115 |
| H(30A) | 5801 | 5797  | 7805  | 79  |
| H(33A) | 4242 | -1856 | 8247  | 103 |
| H(34A) | 3061 | -1525 | 7937  | 116 |
| H(35A) | 2307 | 154   | 8341  | 124 |
| H(36A) | 2733 | 1503  | 9055  | 117 |
| H(37A) | 3913 | 1172  | 9365  | 83  |
| H(38A) | 4259 | -3417 | 10060 | 78  |
| H(38B) | 4000 | -1811 | 9755  | 78  |
| H(38C) | 4627 | -1660 | 10180 | 78  |
| H(39A) | 4417 | -5215 | 9360  | 104 |
| H(39B) | 4819 | -4708 | 8903  | 104 |
| H(39C) | 4103 | -3784 | 9003  | 104 |

---

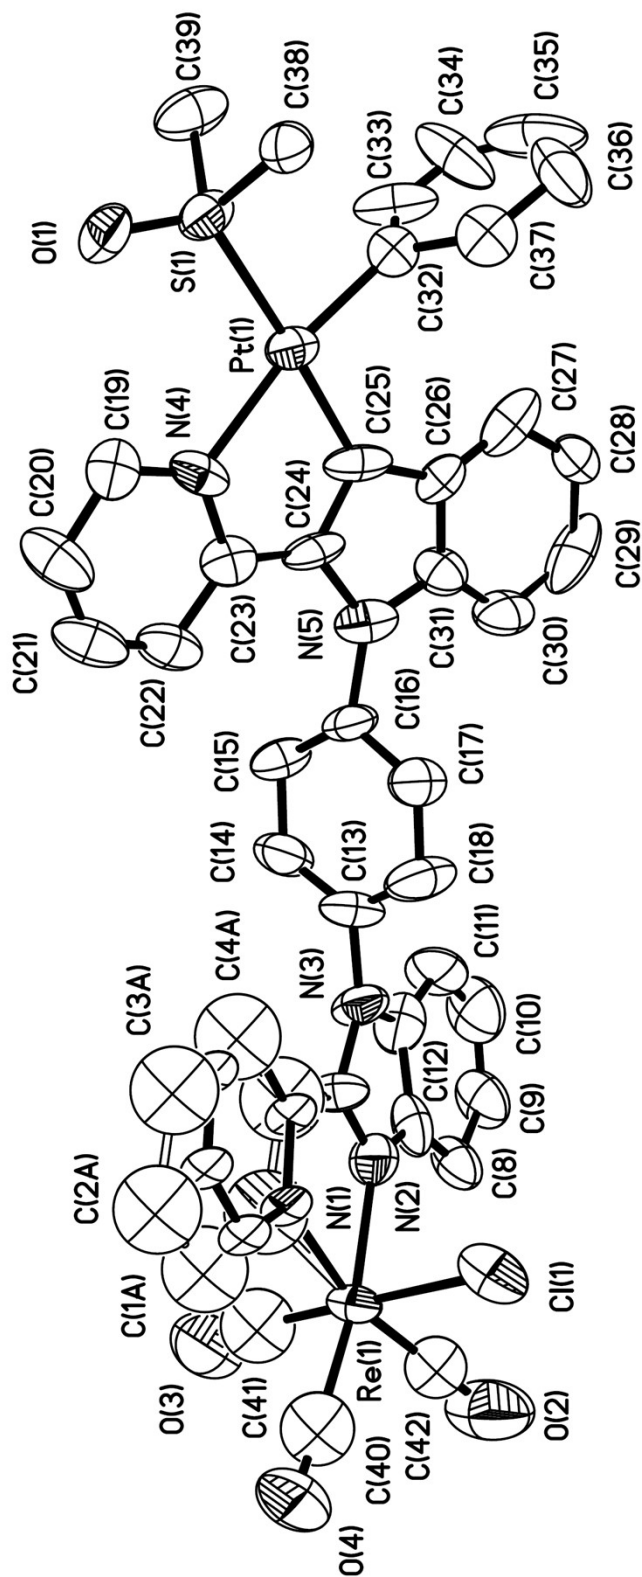

Figure S3. The structure of **Re-Pt(DMSO)** with 50% thermal ellipsoids and labeling schemes. H atoms are omitted for clarity.

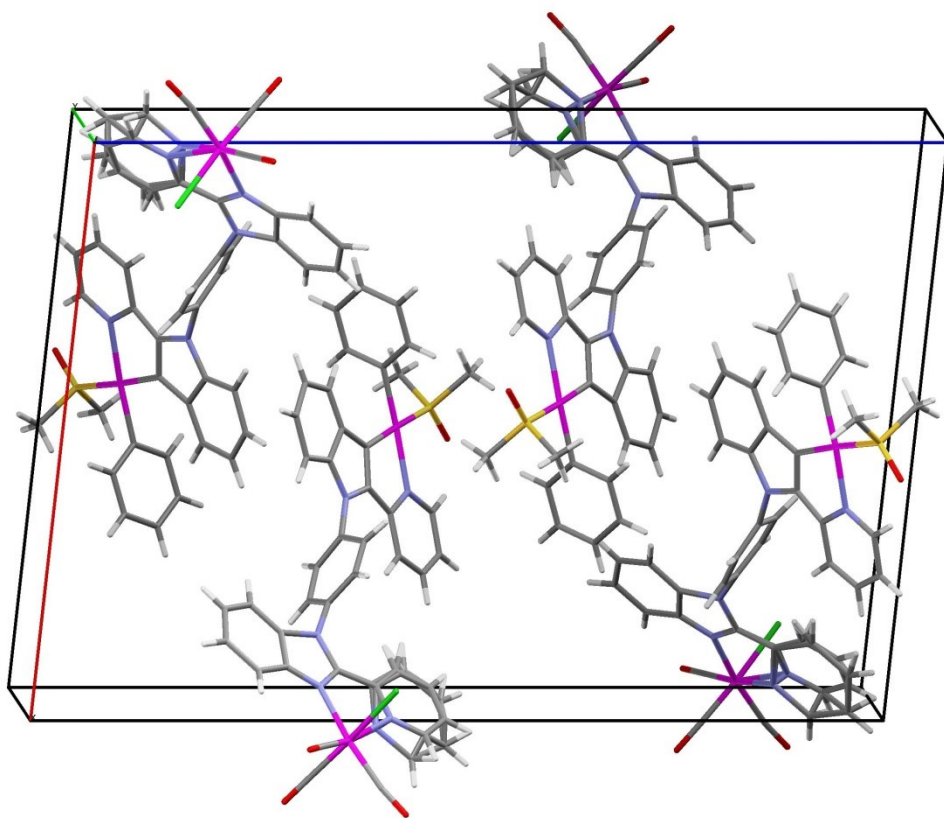

Figure S4. Unit cell pack diagram of **Re-Pt(DMSO)**, projected down the b-axis.

## S5. Experimental Spectra

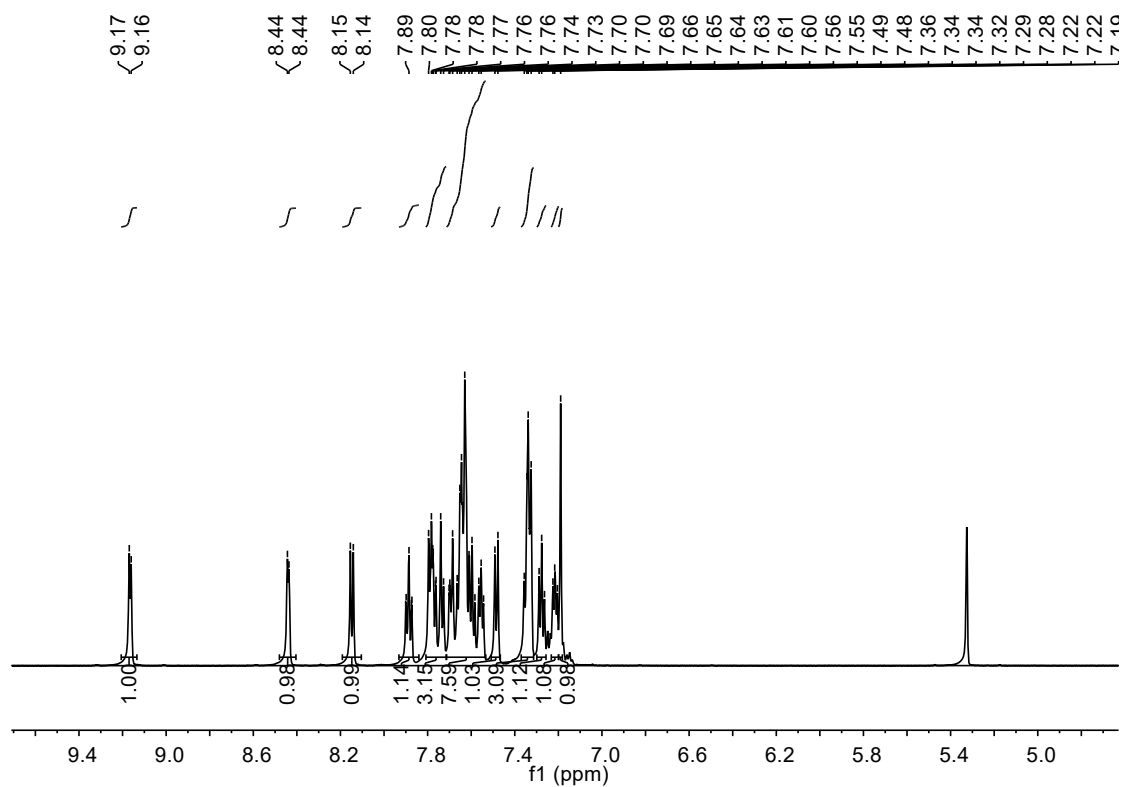

Figure S5.  $^1\text{H}$  NMR spectrum of **Re-L1** in  $\text{CD}_2\text{Cl}_2$ .

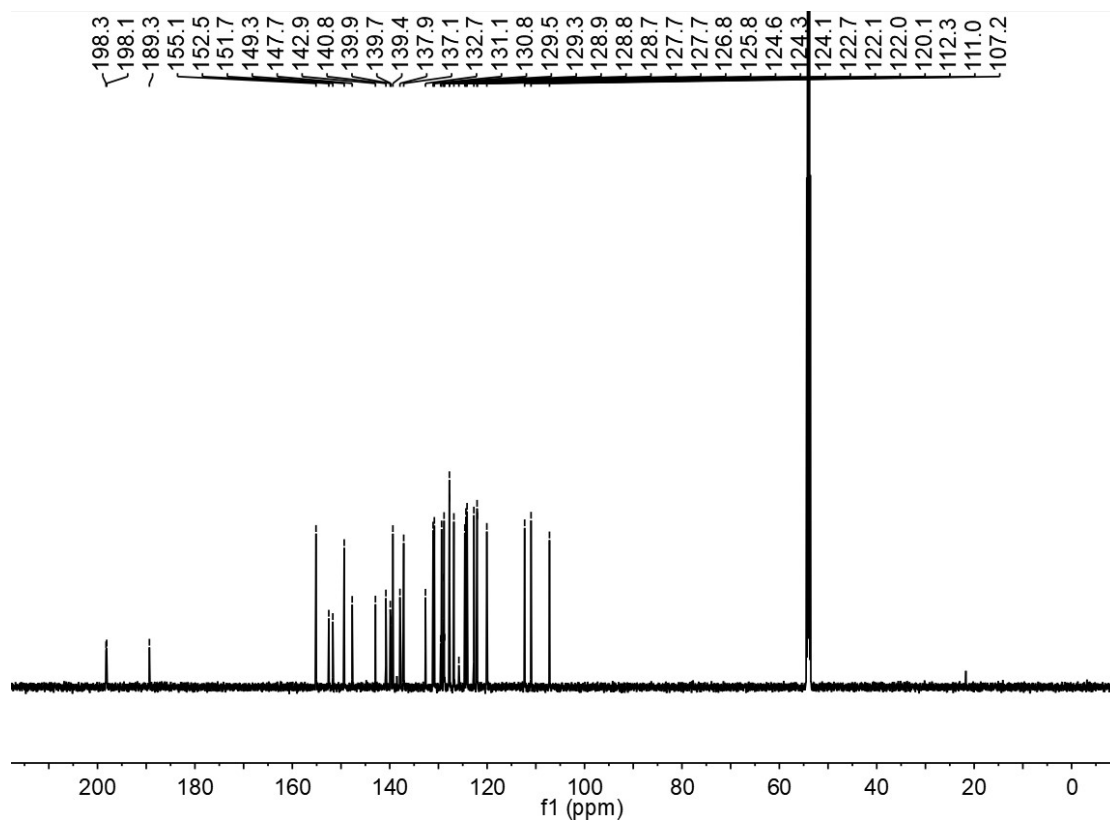

Figure S6.  $^{13}\text{C}$  NMR spectrum of **Re-L1** in  $\text{CD}_2\text{Cl}_2$ .

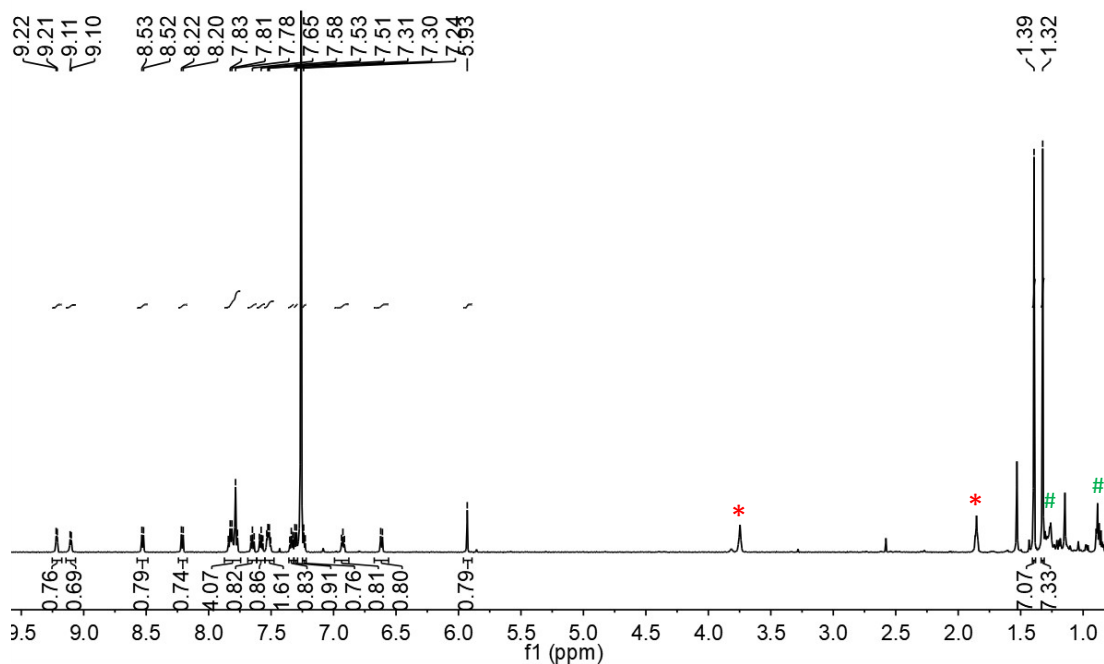

Figure S7.  $^1\text{H}$  NMR spectrum of **Re-Pt(dpm)** in  $\text{CDCl}_3$ . (\*: solvent signal from THF; #: solvent signal from hexane.)

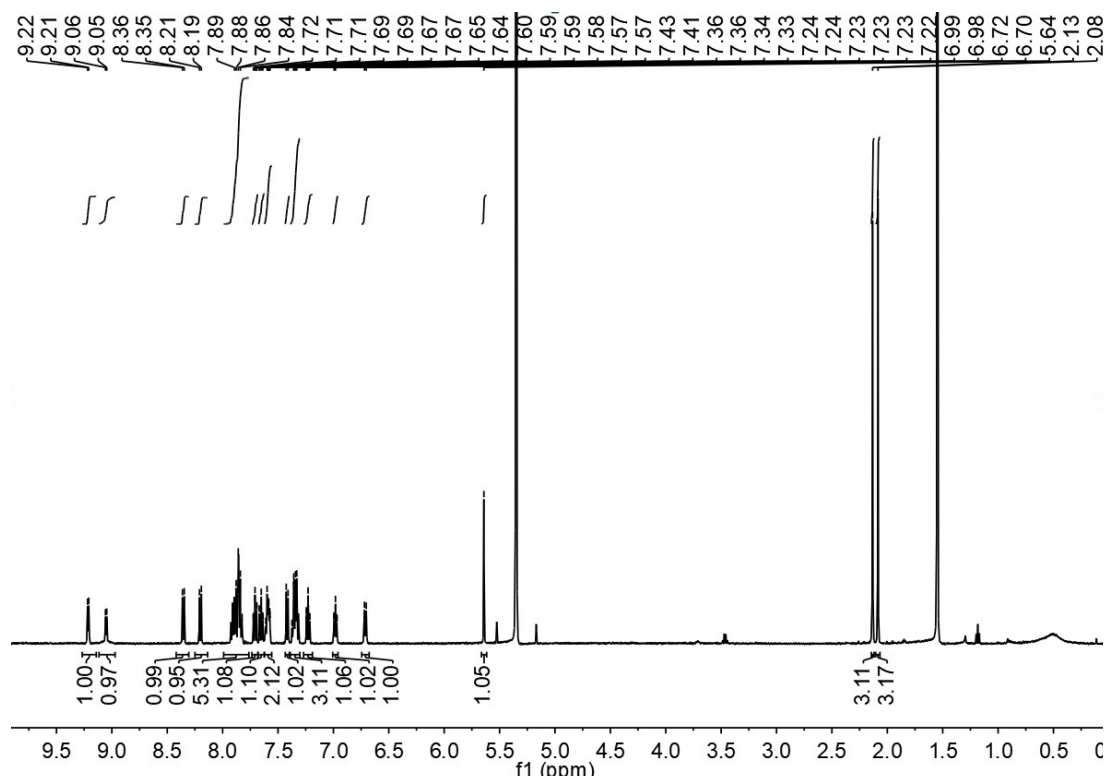

Figure S8.  $^1\text{H}$  NMR spectrum of **Re-Pt** in  $\text{CD}_2\text{Cl}_2$ .

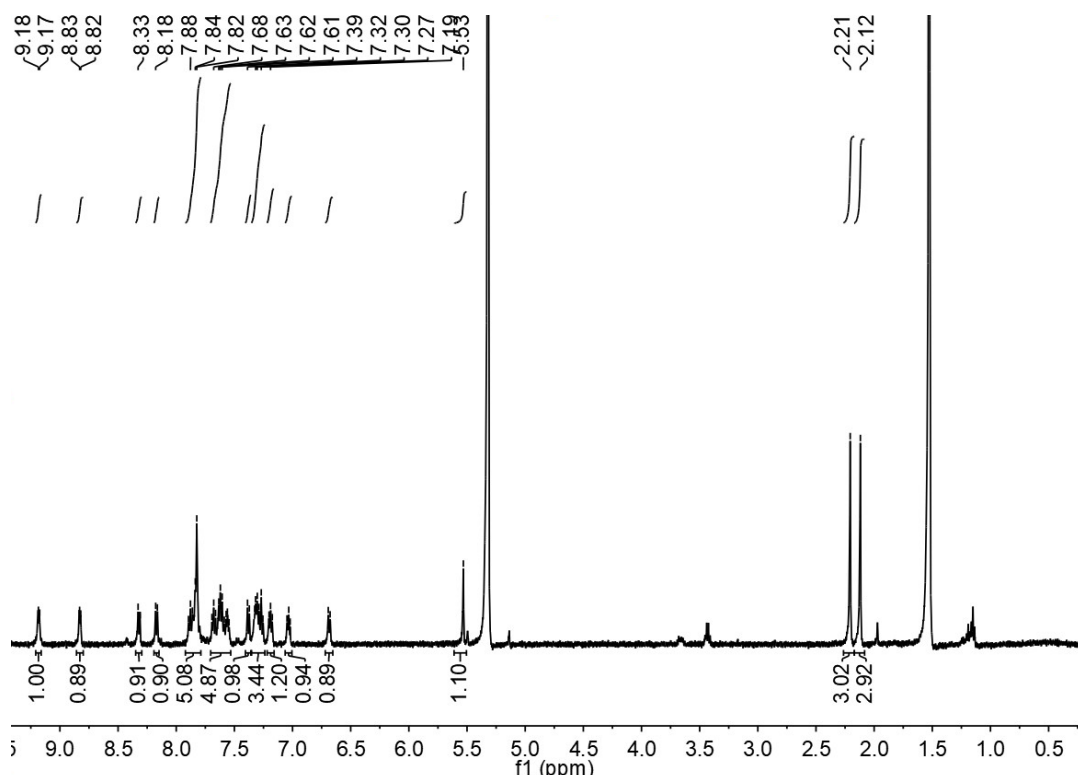

Figure S9.  $^1\text{H}$  NMR spectrum of **Re-Pd** in  $\text{CD}_2\text{Cl}_2$ .

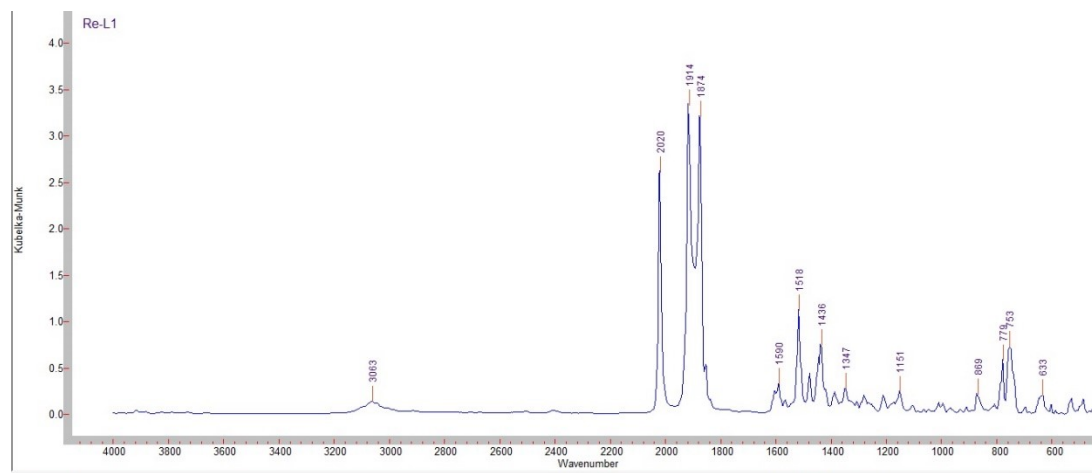

Figure S10. IR spectrum of **Re-L1**.

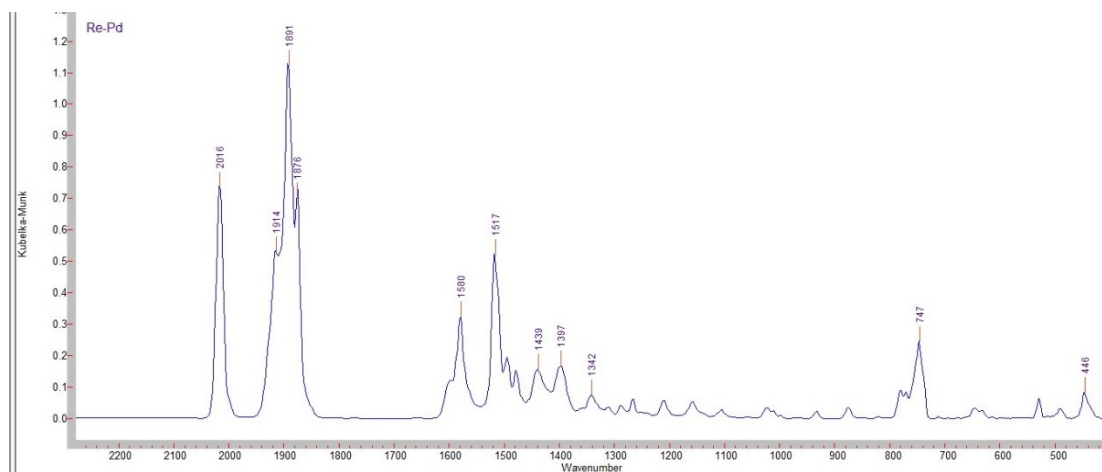

Figure S11. IR spectrum of **Re-Pd**.

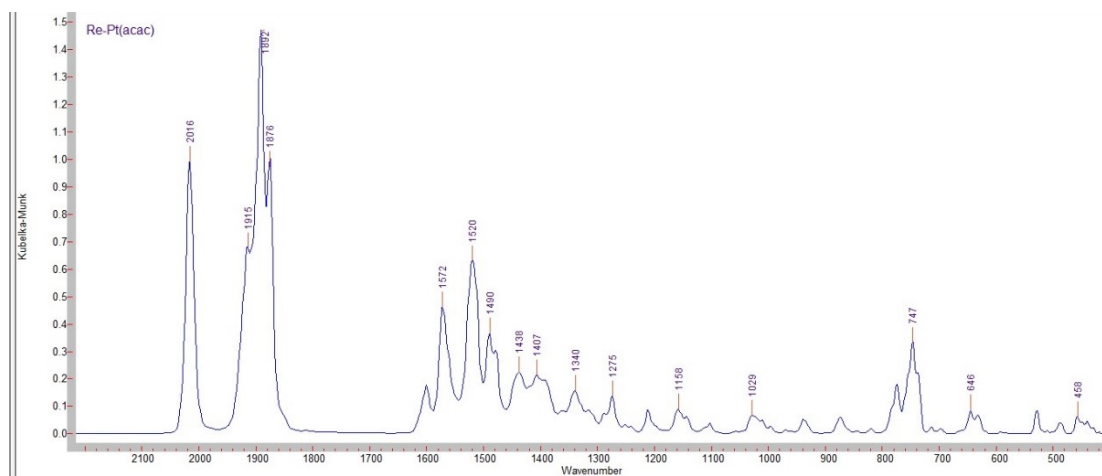

Figure S12. IR spectrum of **Re-Pt**.

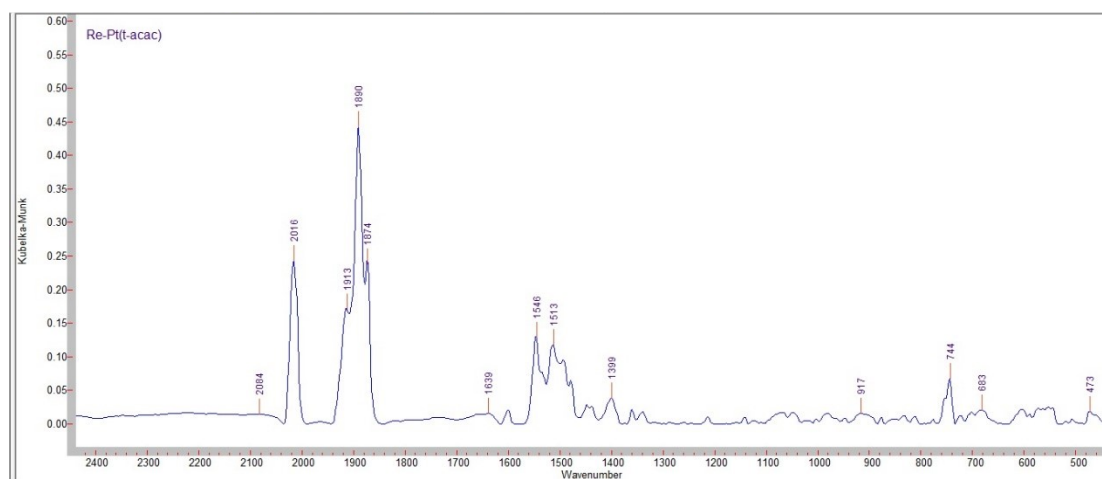

Figure S13. IR spectrum of **Re-Pt(dpm)**.

## Reference

1. N. Wang, J.-s. Lu, T. M. McCormick and S. Wang, *Dalton Trans.*, 2012, **41**, 5553-5561.
2. G. S. Hill, M. J. Irwin, C. J. Levy, L. M. Rendina, R. J. Puddephatt, R. A. Andersen and L. Mclean, in *Inorganic Syntheses*, 1998, pp. 149-153.
3. A. Klein, T. Schurr, A. Knödler, D. Gudat, K.-W. Klinkhammer, V. K. Jain, S. Zális and W. Kaim, *Organometallics*, 2005, **24**, 4125-4131.
4. Z. M. Hudson, B. A. Blight and S. Wang, *Org. Lett.*, 2012, **14**, 1700-1703.
5. M. J. T. Frisch, G. W.; Schlegel, H. B.; Scuseria, G. E.; Robb, M. A.; Cheeseman, J. R.; Scalmani, G.; Barone, V.; Mennucci, B.; Petersson, G. A.; Nakatsuji, H.; Caricato, M.; Li, X.; Hratchian, H. P.; Izmaylov, A. F.; Bloino, J.; Zheng, G.; Sonnenberg, J. L.; Hada, M.; Ehara, M.; Toyota, K.; Fukuda, R.; Hasegawa, J.; Ishida, M.; Nakajima, T.; Honda, Y.; Kitao, O.; Nakai, H.; Vreven, T.; Montgomery, J. A., Jr.; Peralta, J. E.; Ogliaro, F.; Bearpark, M.; Heyd, J. J.; Brothers, E.; Kudin, K. N.; Staroverov, V. N.; Kobayashi, R.; Normand, J.; Raghavachari, K.; Rendell, A.; Burant, J. C.; Iyengar, S. S.; Tomasi, J.; Cossi, M.; Rega, N.; Millam, J. M.; Klene, M.; Knox, J. E.; Cross, J. B.; Bakken, V.; Adamo, C.; Jaramillo, J.; Gomperts, R.; Stratmann, R. E.; Yazyev, O.; Austin, A. J.; Cammi, R.; Pomelli, C.; Ochterski, J. W.; Martin, R. L.; Morokuma, K.; Zakrzewski, V. G.; Voth, G. A.; Salvador, P.; Dannenberg, J. J.; Dapprich, S.; Daniels, A. D.; Farkas, Ö.; Foresman, J. B.; Ortiz, J. V.; Cioslowski, J.; Fox, D. J., *Gaussian 09, Revision D.01*, Gaussian, Inc., Wallingford CT, 2016.
6. A. D. Becke, *J. Chem. Phys.*, 1993, **98**, 5648-5652.
7. C. Lee, W. Yang and R. G. Parr, *Phys. Rev. B*, 1988, **37**, 785-789.
8. P. J. Hay, *J. Phys. Chem. A*, 2002, **106**, 1634-1641.
